# Supplementary material for: Role of physiotherapy in supporting recovery from breast cancer treatment: a qualitative study embedded within the UK PROSPER trial
Source: PubMed Central journal article supplement (PMC8118023; doi:10.1136/bmjopen-2020-040116), 2021-05-11
Supplement: bmjopen-2020-040116.draft_revisions.pdf [file bmjopen-2020-040116.draft_revisions.pdf]

# BMJ Open

BMJ Open is committed to open peer review. As part of this commitment we make the peer review history of every article we publish publicly available.

When an article is published we post the peer reviewers' comments and the authors' responses online. We also post the versions of the paper that were used during peer review. These are the versions that the peer review comments apply to.

The versions of the paper that follow are the versions that were submitted during the peer review process. They are not the versions of record or the final published versions. They should not be cited or distributed as the published version of this manuscript.

BMJ Open is an open access journal and the full, final, typeset and author-corrected version of record of the manuscript is available on our site with no access controls, subscription charges or pay-per-view fees (<http://bmjopen.bmj.com>).

If you have any questions on BMJ Open's open peer review process please email [info.bmjopen@bmj.com](mailto:info.bmjopen@bmj.com)

# BMJ Open

## The role of physiotherapy in supporting recovery from breast cancer treatment: A qualitative study embedded within the UK PROSPER trial

|                               |                                                                                                                                                                                                                                                                                                                                                                                                                                                                                                                                                                                                                                       |
|-------------------------------|---------------------------------------------------------------------------------------------------------------------------------------------------------------------------------------------------------------------------------------------------------------------------------------------------------------------------------------------------------------------------------------------------------------------------------------------------------------------------------------------------------------------------------------------------------------------------------------------------------------------------------------|
| Journal:                      | <i>BMJ Open</i>                                                                                                                                                                                                                                                                                                                                                                                                                                                                                                                                                                                                                       |
| Manuscript ID                 | bmjopen-2020-040116                                                                                                                                                                                                                                                                                                                                                                                                                                                                                                                                                                                                                   |
| Article Type:                 | Original research                                                                                                                                                                                                                                                                                                                                                                                                                                                                                                                                                                                                                     |
| Date Submitted by the Author: | 06-May-2020                                                                                                                                                                                                                                                                                                                                                                                                                                                                                                                                                                                                                           |
| Complete List of Authors:     | Rees, Sophie; University of Warwick, Warwick Clinical Trials Unit<br>Mazuquin, Bruno; University of Warwick, Warwick Clinical Trials Unit<br>Richmond, Helen ; University of Warwick, Warwick Clinical Trials Unit;<br>Memorial University of Newfoundland, Faculty of Medicine<br>Williamson, Esther; Nuffield Department of Orthopaedics, Rheumatology and Musculoskeletal Sciences, University of Oxford, United Kingdom. ,<br>Centre for Rehabilitation Research in Oxford<br>Bruce, Julie; University of Warwick, Warwick Clinical Trials Unit<br>-, UK PROSPER Study Group; University of Warwick, Warwick Clinical Trials Unit |
| Keywords:                     | QUALITATIVE RESEARCH, Breast surgery < SURGERY, PREVENTIVE MEDICINE                                                                                                                                                                                                                                                                                                                                                                                                                                                                                                                                                                   |
|                               |                                                                                                                                                                                                                                                                                                                                                                                                                                                                                                                                                                                                                                       |

SCHOLARONE™  
Manuscripts

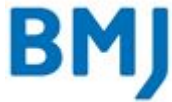

I, the Submitting Author has the right to grant and does grant on behalf of all authors of the Work (as defined in the below author licence), an exclusive licence and/or a non-exclusive licence for contributions from authors who are: i) UK Crown employees; ii) where BMJ has agreed a CC-BY licence shall apply, and/or iii) in accordance with the terms applicable for US Federal Government officers or employees acting as part of their official duties; on a worldwide, perpetual, irrevocable, royalty-free basis to BMJ Publishing Group Ltd ("BMJ") its licensees and where the relevant Journal is co-owned by BMJ to the co-owners of the Journal, to publish the Work in this journal and any other BMJ products and to exploit all rights, as set out in our [licence](#).

The Submitting Author accepts and understands that any supply made under these terms is made by BMJ to the Submitting Author unless you are acting as an employee on behalf of your employer or a postgraduate student of an affiliated institution which is paying any applicable article publishing charge ("APC") for Open Access articles. Where the Submitting Author wishes to make the Work available on an Open Access basis (and intends to pay the relevant APC), the terms of reuse of such Open Access shall be governed by a Creative Commons licence – details of these licences and which [Creative Commons](#) licence will apply to this Work are set out in our licence referred to above.

Other than as permitted in any relevant BMJ Author's Self Archiving Policies, I confirm this Work has not been accepted for publication elsewhere, is not being considered for publication elsewhere and does not duplicate material already published. I confirm all authors consent to publication of this Work and authorise the granting of this licence.

# The role of physiotherapy in supporting recovery from breast cancer treatment: A qualitative study embedded within the UK PROSPER trial

Rees S,<sup>1</sup> Mazuquin B,<sup>1</sup> Richmond H,<sup>1,2</sup> Williamson E,<sup>3</sup> Bruce J.<sup>1</sup> on behalf of the UK PROSPER Study Group<sup>1</sup>

<sup>1</sup>*Warwick Clinical Trials Unit, University of Warwick Medical School, Coventry, UK CV4 7AL*

<sup>2</sup>*Faculty of Medicine, Memorial University of Newfoundland, St John's, Canada*

<sup>3</sup>*The Centre for Rehabilitation Research, Nuffield Department of Orthopaedics, Rheumatology and Musculoskeletal Sciences, University of Oxford*

Corresponding author:

Dr Sophie Rees

[S.Rees.1@warwick.ac.uk](mailto:S.Rees.1@warwick.ac.uk)

02476 151 135

## Abstract

**Objectives:** To explore breast cancer patients' experience of taking part in an early physiotherapy-led exercise intervention compared with the experiences of those receiving usual care. To understand physiotherapists' experience of delivering the trial intervention. To explore future strategies for implementation of the intervention from participant and physiotherapist perspective

**Design:** Qualitative audio-recorded semi-structured interviews with thematic analysis.

**Setting:** UK National Health Service (NHS)

**Participants:** Twenty participants at high risk of shoulder problems after breast cancer surgery, recruited to the UK Prevention of Shoulder Problems (PROSPER) Trial (ten each from the intervention arm and control arm respectively); and eleven physiotherapists who delivered the intervention.

**Results:** Participants described that the PROSPER exercise intervention helped them feel confident in what their body could do, and helped them regain a sense of control in the context of cancer treatment which was largely disempowering. Control arm participants expressed less of a sense of control over their wellbeing. Physiotherapists found the exercise intervention enjoyable to deliver and felt it was valuable to their patients. The extra time allocated to patients during intervention delivery made physiotherapists feel they were providing

1  
2  
3 optimal care, being the 'perfect physio'. Lessons were learned about the implementation of a complex exercise  
4 intervention for breast cancer patients.  
5

6  
7 **Conclusions:** A physiotherapist-delivered early supported exercise intervention with integrated behavioural  
8 strategies helped women at risk of shoulder problems following breast cancer treatment to regain control and feel  
9 more confident in their ability to mobilise their arm post-surgery. A physiotherapist-delivered early supported  
10 exercise intervention with integrated behavioural strategies may address the sense of powerlessness that many  
11 patients experience during cancer treatment.  
12  
13  
14  
15  
16

17  
18 **Keywords:** *breast cancer; physiotherapy; rehabilitation; prevention; shoulder; qualitative research*  
19

## 20 **Acknowledgements**

21  
22  
23 This study was embedded within a multicentre UK randomised controlled trial (ISCR TN35358984) and was  
24 funded by the National Institute for Health Research Health Technology Assessment Programme (HTA 13/84/10).  
25 The research team would like to thank the trial participants and physiotherapists who participated in the qualitative  
26 study.  
27  
28  
29

30  
31 **Word count:** 3,295  
32  
33  
34  
35  
36  
37  
38  
39  
40  
41  
42  
43  
44  
45  
46  
47  
48  
49  
50  
51  
52  
53  
54  
55  
56  
57  
58  
59  
60

## Article Summary

### Strengths and limitations of this study

- Interviewing multiple groups (intervention arm, control arm participants, and physiotherapists) in this study enabled us to triangulate the data and explore experiences from multiple perspectives.
- We note that the participants we interviewed were a particularly motivated group, and it is possible we did not capture some of the challenges which other, less motivated, women may have experienced.
- We obtained consent to be approached for interview prior to randomisation, independent of treatment allocation, in an attempt to minimise bias
- We used a convenience sampling approach, which is a potential weakness of this study as it may have resulted in a lack of diversity amongst participants.
- Our sample was overwhelmingly white, with only one of the participants identifying as another ethnic identity.

## Introduction

Treatment to the chest and axilla for breast cancer can result in upper body problems, such as reduced range of movement in the shoulder, muscle weakness, pain, lymphoedema, and functional limitations [1, 2]. These problems can impact on ability to carry out activities of daily living, and may persist for many years after treatment [1, 2]. Exercise in the acute phase following breast cancer surgery may improve shoulder function in women at high risk of shoulder problems [1]. Guidelines state that breast cancer patients should be referred to physiotherapy when indicated [3, 4], however, in the UK NHS this is not routine practice. There is a need for a proactive model of care which encourages early exercise-based rehabilitation and provides physiotherapists with resources to inform their practice [5]. Loss of a sense of control, loss of self-identity, and alienation from their bodies during and after treatment are often reported by breast cancer patients [6-12]. It has been proposed that improving women's self-efficacy through physical rehabilitation may improve their quality of life [6].

The UK Prevention Of Shoulder Problems (PROSPER) Trial evaluated the clinical and cost-effectiveness of an early supported home-based physiotherapist-led exercise intervention in women with newly diagnosed breast

1  
2  
3 cancer at higher risk of developing shoulder problems after treatment [13, 14]. A description of the intervention  
4 and trial protocol have been published [14]. This paper reports the findings of the UK PROSPER trial embedded  
5 qualitative study. Figure 1 illustrates the pathway of participants through the trial and embedded qualitative study.  
6  
7  
8

9 The aims of the qualitative study were:

- 10  
11
- 12 • To understand the acceptability of the exercise intervention to participants
  - 13
  - 14 • To explore how the exercise intervention or control affected their experiences of recovery after cancer  
15 treatment.
  - 16
  - 17 • To investigate the experiences of physiotherapists delivering the exercise intervention.
  - 18
  - 19 • To explore future strategies for implementation of the intervention in the UK NHS setting from the  
20 participant and physiotherapist perspective.  
21  
22  
23  
24  
25  
26  
27  
28  
29  
30  
31  
32  
33  
34  
35  
36  
37  
38  
39  
40  
41  
42  
43  
44  
45  
46  
47  
48  
49  
50  
51  
52  
53  
54  
55  
56  
57  
58  
59  
60

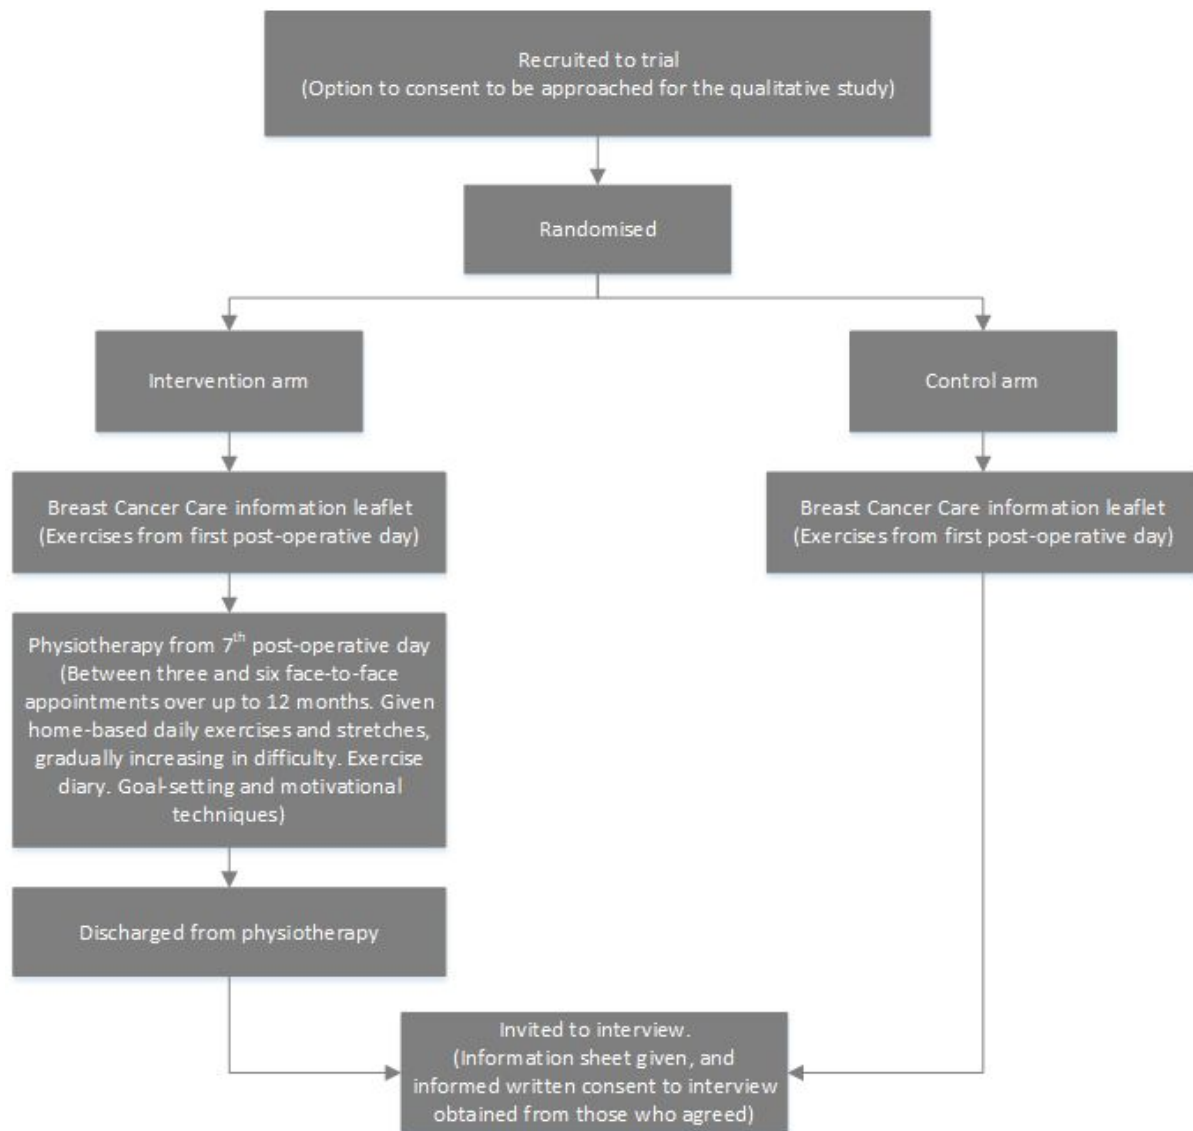

Figure 1 - Participant pathway through trial and qualitative study

## Methods

### Methodology

The study was underpinned by critical realism, assuming that an underlying reality is experienced and given meaning by individuals [15, 16]. To meet the study aims, we conducted qualitative semi-structured interviews with reflexive thematic analysis [17]. This allowed for exploration, depth, and understanding of the experiences of trial participants, thus taking an interpretive ‘sense-making’ approach rather than hypothesis-testing or confirmatory approach. We used the SRQR reporting guidelines checklist [18].



## Sampling and recruitment

### *Trial participant interviews*

On recruitment to the trial, we offered all trial participants the option to take part in an interview at a later date (see Figure 1). We recorded signed consent to be approached for interview and this formed our sampling frame for the qualitative study. Women in the intervention arm were approached after they were discharged from physiotherapy to avoid contamination bias. The researcher (SR) telephoned participants to invite them to interview, and, if they expressed an interest, participants were sent an information sheet and interview consent form.

After conducting and analysing seven interviews with intervention participants, we decided to interview control arm participants, to compare their experiences. We used our database of those who had consented pre-randomisation to select a sample comparable to the intervention sample in terms of time since randomisation, so that women were at similar stages of postoperative treatment and could reflect back over their experiences of recovery.

### *Physiotherapist interviews*

All physiotherapists delivering the intervention were informed about the interview study. We then sampled physiotherapists from low and high recruiting trial sites to allow exploration of different perspectives on intervention delivery. Therapists were approached by the researcher via email or telephone.

## Data collection

Flexible topic guides were developed by the research team and with breast cancer patients, based on the aims of the study and relevant literature. One-off interviews were conducted either at the participant's home, by telephone (trial participants), or in a private room at their place of work (physiotherapists). Physiotherapists who worked together were interviewed in pairs. Only the researcher and interviewees were present. All interviews were audio-recorded. Informed consent was gained before the interview began. The study was approved by the National Research Ethics Service Committee West Midlands Solihull on 20<sup>th</sup> July 2015 (Ref no. 15/WM/0224),

## Data analysis

Interviews were transcribed verbatim, checked for accuracy and anonymity by the researcher (SR), and then uploaded to QSR NVivo Pro 11 [19]. Thematic analysis [20, 21] was conducted by SR. Analysis began alongside data collection. The research team met regularly to discuss emerging findings and the evolving analysis [22]. Saturation in this study meant that we had enough data to understand each of the identified categories and themes, rather than that there was ‘nothing new’ to be found [23, 24]. We reached saturation after fifteen trial participant interviews, and five physiotherapist interviews.

## Reflexivity and rigour

Interviews were conducted sensitively by a female researcher experienced in interviewing cancer patients (SR) [12, 25-28]. The evolving analysis was discussed with the research team (SR/JB/HR/BM). SR is a social scientist with expertise in qualitative research with people with health conditions, including breast cancer, and healthcare professionals. HR and BM are researchers and physiotherapists. JB is a trialist and PROSPER Chief Investigator, she did not influence the qualitative study findings, but provided important contextual details regarding the trial and intervention. We were careful to conduct balanced interviews, without assuming that the trial participants and physiotherapists would have positive views of the intervention. SR reminded interviewees throughout that she was not involved in the development of the intervention, and welcomed their honest views. Rigour was assessed using Lincoln and Guba’s conceptualisation of trustworthiness [29]. SR collected the data and was immersed in the data during analysis. Quotes have been provided to illustrate themes.

## Results

### Sample

We recruited 392 women (196 per arm) to the PROSPER clinical trial from 17 breast cancer centres in England. Overall, 67% (n=264/392) of trial participants provided signed consent to be contacted for an interview. In total, we attempted to contact 53 women regarding an interview. Of these, 11 were not contactable, 17 agreed initially for an interview but could not be reached again, and five declined. Ten participants from the intervention arm and ten from the control arm were interviewed from 11 of the 17 study sites (see Table 1).

Interviews were carried out with 11/44 (25%) physiotherapists (all female) trained to deliver the intervention from six study sites. Ten were interviewed in pairs and one individually. The physiotherapists had treated between one and 16 trial participants (median 5) and were based at hospitals that did not routinely provide postoperative physiotherapy after breast cancer surgery. They were experienced in the management of musculoskeletal conditions but did not work in breast cancer or oncology units. Some physiotherapists had experience of treating breast cancer patients presenting with problems such as restricted shoulder movement preventing the start of radiotherapy.

Table 1 - Study sample (trial participants)

| Characteristic                          | Intervention arm N=10 | Control arm N=10 |
|-----------------------------------------|-----------------------|------------------|
| Months since randomisation, mean(range) | 7 (3-11)              | 7 (3-12)         |
| Age at randomisation, mean (range)      | 51 (28-69)            | 60 (44-79)       |
| Age at randomisation                    |                       |                  |
| 18-29                                   | 1                     | 0                |
| 30-39                                   | 0                     | 0                |
| 40-49                                   | 4                     | 2                |
| 50-59                                   | 3                     | 3                |
| 60-69                                   | 2                     | 3                |
| 70-79                                   | 0                     | 2                |
| Ethnicity                               |                       |                  |
| White                                   | 9                     | 10               |
| Mixed                                   | 1                     | 0                |
| Surgical treatment*                     |                       |                  |
| Mastectomy                              | 4                     | 3                |
| Breast conserving surgery               | 6                     | 7                |
| Axillary node clearance                 | 10                    | 8                |
| Sentinel lymph node biopsy              | 3                     | 4                |
| Adjuvant therapy*                       |                       |                  |
| Chemotherapy                            | 9                     | 7                |
| Radiotherapy                            | 9                     | 10               |

\*participants had multiple treatments

We identified three themes from the data: 'healing'; 'being the perfect therapist'; and 'delivering physiotherapy to breast cancer patients'. Each theme is described below with subthemes. Supporting quotes are provided in Tables 2-4.

## Healing

## Reassurance

In the acute period after surgery, all participants felt afraid to move their upper body, and they felt unable to do the exercises prescribed in the Breast Cancer Care information leaflet. Participants allocated to the intervention felt reassured by physiotherapists that they were capable and able to move. They felt reassured that bodily sensations, such as stiffness, were normal and not something to worry about. Physiotherapists felt that they were able to increase participants' confidence in moving their bodies, and that this lifted participants' confidence more broadly. Some described this as giving participants 'permission' to move, which was necessary to prevent movement restrictions in the upper body.

## Making progress

This theme refers to physical improvements felt by participants in the intervention arm. This included how far they could stretch and how strong they were. Improvements were measurable and tangible, and participants highlighted the central role of the physiotherapist in creating this sense of progress.

Over time, participants progressed from gentle stretching to more advanced stretching and strengthening exercises as they improved. Progression was fulfilling and rewarding, particularly in the context of cancer treatment where a sense that they were improving or getting better was lacking. To be able to measurably perceive progress in strength and movement helped to restore a sense of bodily autonomy for the women who felt disempowered by cancer treatment. It helped them to feel that they *were* getting better, at least in some way.

## Helping myself

During breast cancer treatment, women passively receive treatment [7-9, 30]. One participant described it as being "a professional waiter, you just sit and wait, and you just let everyone do what they're doing" - QR23 (Age 62, Control arm participant).

In collaboration with their physiotherapist, participants receiving the exercise intervention could choose which exercises they performed from a menu, selecting exercises they felt most confident and comfortable doing. The physiotherapists felt that joint-decision making was a patient-centred approach which added to patients' sense of

ownership and control of their exercises. Physiotherapists and participants both noted that this gave patients an opportunity to be pro-active, taking control of one aspect of their recovery. This sense of responsibility and ownership motivated them to exercise.

This is in contrast to the control arm interviewees. Most control participants spoke about accepting postoperative problems or just waiting for these to improve over time, apart from a few highly motivated individuals who described inventing their own exercises. Wanting to be a 'good' patient and doing as one was told motivated control group participants to follow the exercises on the Breast Cancer Care leaflet. This is in contrast to the sense of self-determination, control, and progress described by participants receiving the intervention.

## Looking ahead

Some participants continued to draw on knowledge gained from the intervention to alleviate ongoing problems with tightness and stiffness, and appeared to feel quite confident in managing this in the future. They felt assured that continuing with such activities would help them, and that they would know what to do or where to seek help if required.

Table 2 - Theme 1: Healing

| Subtheme        | Supporting quotes                                                                                                                                                                                                                                                                                                                                                                                                                                                                                                                                                                                                                                                                                                                                                                                                                                                                                                                                                                                                                                                                                                                               |
|-----------------|-------------------------------------------------------------------------------------------------------------------------------------------------------------------------------------------------------------------------------------------------------------------------------------------------------------------------------------------------------------------------------------------------------------------------------------------------------------------------------------------------------------------------------------------------------------------------------------------------------------------------------------------------------------------------------------------------------------------------------------------------------------------------------------------------------------------------------------------------------------------------------------------------------------------------------------------------------------------------------------------------------------------------------------------------------------------------------------------------------------------------------------------------|
| Reassurance     | <p><i>It's quite tender...you don't feel like you ought to be doing it...you feel like it's too soon...I was aching so much that I just thought 'I just can't do this'.</i> – Qualitative Respondent (QR) 24 (Age 51, Control arm participant)</p> <p><i>The, er, physiotherapist...was able to tell you whether you were doing things right or wrong or how things were going within your body.</i> – QR09 (Age 69, Intervention arm participant)</p> <p><i>They think they're going to split their stitches if they stretch them up. So it's just the reassurance and guidance we give them.</i> – PT09 (Physiotherapist)</p> <p>Interviewer: What do you think they get out of coming to see you?<br/>PT02 (Physiotherapist): <i>I think confidence. Confidence to actually move...confidence to look after themselves, that they can do things</i></p> <p><i>Some people it completely changed their kind of outlook on what they could achieve...it was really encouraging for me to see like you'd given them a new lease of life or like a new hopefulness about what they could achieve in the future.</i> – PT08 (Physiotherapist)</p> |
| Making progress | <p><i>You could kind of measure it yourself and assess it yourself because you knew how far you could get your arm up...You could feel when, when things started to get a bit better.</i> – QR08 (Age 43, Intervention arm participant)</p> <p><i>You saw results and sometimes with your cancer...you don't see results until the end 'til they say 'You're all clear' you are just going through awful, awful, awful praying and hoping...But it is a really positive thing to think 'Oh something is getting better'.</i> – QR12 (Age 55, Intervention arm participant, participant's emphasis)</p>                                                                                                                                                                                                                                                                                                                                                                                                                                                                                                                                          |

|                |                                                                                                                                                                                                                                                                                                                                                                                                                                                                                                                                                                                                                                                                                                                                                                                                                                                                                                                                                                                                                                                                                                                                                                                                                                                                                                                                                                                                                                                                                                                                                                                                                                                                                                                                                                                                                                                                                                                                                                                        |
|----------------|----------------------------------------------------------------------------------------------------------------------------------------------------------------------------------------------------------------------------------------------------------------------------------------------------------------------------------------------------------------------------------------------------------------------------------------------------------------------------------------------------------------------------------------------------------------------------------------------------------------------------------------------------------------------------------------------------------------------------------------------------------------------------------------------------------------------------------------------------------------------------------------------------------------------------------------------------------------------------------------------------------------------------------------------------------------------------------------------------------------------------------------------------------------------------------------------------------------------------------------------------------------------------------------------------------------------------------------------------------------------------------------------------------------------------------------------------------------------------------------------------------------------------------------------------------------------------------------------------------------------------------------------------------------------------------------------------------------------------------------------------------------------------------------------------------------------------------------------------------------------------------------------------------------------------------------------------------------------------------------|
|                | <i>Having those meetings with somebody and seeing the progress that I was making and having her tell me, you know, 'Yeah this is great and now try this' and then having different exercises it kind of made it better for me. – QR13 (Age 28, Intervention arm participant)</i>                                                                                                                                                                                                                                                                                                                                                                                                                                                                                                                                                                                                                                                                                                                                                                                                                                                                                                                                                                                                                                                                                                                                                                                                                                                                                                                                                                                                                                                                                                                                                                                                                                                                                                       |
| Helping myself | <p><i>I think it was more than the exercise. I think it was because you were doing something, because so much of um cancer care is being done to you...It was just quite nice to have something proactive for you to do rather than just turn up and have the drugs. – QR12 (Age 55, Intervention arm participant)</i></p> <p><i>That was the biggest thing was that they felt that they were doing something for themselves to try and help their arm with the cancer that we weren't always doing things to them, they had the confidence to do it for themselves. – PT02 (Physiotherapist)</i></p> <p><i>For me, you know, having the same... the same desired outcome as the physiotherapist and [wife] you know, kind of, being all, all, all wanting the same thing. And it kind of felt if I did those things then I would eventually achieve it. – QR08 (Age 43, Intervention arm participant)</i></p> <p><i>I think when we were sort of promoting why we think the exercises were useful I talked about self-determination this is something that you can do for yourself and your care...particularly the way it was designed that enabled the patients to say well we could do this exercise or we could do that one. – PT10 (Physiotherapist)</i></p> <p>Control arm responses in contrast:<br/><i>It still gets stiff now but you just have to deal with it. – QR19 (Age 68, Control arm participant)</i></p> <p><i>Lifting up now and I can feel the stretching down that left-hand side, but, um, you know I don't know, I suppose it's had trauma. – QR15 (Age 44, Control arm participant)</i></p> <p><i>Well I'd like to think I was a good patient, I started my exercises the day after I came out of hospital. – QR26 (Age 56, Control arm participant)</i></p> <p><i>Just the fact that the hospital gave them you and, you know, they know what they're talking about. You do it because you've been told to. – QR23 (Age 62, Control arm participant)</i></p> |
| Looking ahead  | <p><i>It's a nice thing to fall back on when I haven't and I think 'Oh this feels a bit tight' then it's like 'Right' get your act into gear and then do it and it does straight away it loosens it. – QR12 (Age 55, Intervention arm participant)</i></p> <p><i>Now I'm just doing the massage for lymphoedema and exercises only if I feel the problem...For example if, if I feel the problem to reach the shelf I'm taking [the] band and I might warm it up just do the exercises with the elastic band exactly for this movement. – QR10 (Age 50, Intervention arm participant)</i></p> <p><i>I still go to the gym and there's a really nice instructor there and he's set me a new, um, what do you call it, programme [for] strengthening – QR12 (Age 55, Intervention arm participant)</i></p> <p><i>In a couple of months or so, I would like to kind of start using weights so that I can strengthen my arms...It's kind of like building up the strength that I was building towards whilst I was doing the [PROSPER] exercises before. – QR13 (Age 28, Intervention arm participant)</i></p>                                                                                                                                                                                                                                                                                                                                                                                                                                                                                                                                                                                                                                                                                                                                                                                                                                                                             |

## Being the 'perfect' therapist

This theme describes the physiotherapists' reflections on the trial intervention compared to their usual practice and how it enabled them to deliver an optimal service. Specifically, having longer appointment times and an

emphasis on shared goals and shared decisions, both of which encouraged exercise adherence, were viewed as central. Many of the therapists remarked that they were pleased to be able to offer this service to breast cancer patients because of their previous experience of treating women struggling with chronic immobility, pain, and psychological issues as a result of shoulder problems following breast cancer surgery. Physiotherapists connected this to the broader organisation of the NHS, and the need allocate resources to preventive care.

Table 3 - Theme 2: Being the 'perfect' therapist

| Supporting Quotes                                                                                                                                                                                                                                                                                                                                                                                                                                                                                                                                                                                                                                                                                                           |
|-----------------------------------------------------------------------------------------------------------------------------------------------------------------------------------------------------------------------------------------------------------------------------------------------------------------------------------------------------------------------------------------------------------------------------------------------------------------------------------------------------------------------------------------------------------------------------------------------------------------------------------------------------------------------------------------------------------------------------|
| <i>It almost like it made you be the perfect physio and the perfect way you should treat patients but you don't always have time to do that. – PT03 (Physiotherapist)</i>                                                                                                                                                                                                                                                                                                                                                                                                                                                                                                                                                   |
| <i>Agreed goals [and] agreed exercises actually that should be what we're doing anyway that shouldn't be anything radically different but sometimes because of time pressures you don't...If you work more collaboratively with patients there are massive benefits to it and I think it just reinforced that for me. – PT10 (Physiotherapist)</i>                                                                                                                                                                                                                                                                                                                                                                          |
| <i>When you pick up those patients [later] they come with a lot of emotional baggage and sort of their belief systems and it may have been years since they used their shoulder normally and then you know again if you've got body dysmorphic issues and they've been carrying that around for two years that's a lot more challenging to support. – PT06 (Physiotherapist)</i>                                                                                                                                                                                                                                                                                                                                            |
| <i>We get people coming in about two years later and they've never touched their scar, they never saw a physio, they're stiff, their scar's horrible, they've got awful myofascial trigger points and tightness...They still think two years down the line they're going to hurt themselves if they over stretch so if you get them in at the early stage then it's just better...I had a lady who had a mastectomy it was three years later she never went back to work, she never went back to any exercise, she never touched her scar, her mental wellbeing was like absolutely awful when I first started seeing her because she just didn't even know that she could have her life back. – PT01 (Physiotherapist)</i> |
| <i>I think we work too much reactive in the NHS don't we and I think a direction to move in is work in prevention rather than cure. – PT02 (Physiotherapist)</i>                                                                                                                                                                                                                                                                                                                                                                                                                                                                                                                                                            |
| <i>It makes absolutely no sense you know we're doing all these operations round here where they're just doing small incisions and they routinely see us, but the breast cancer patients who've just had major surgery are just left. It's just madness. – PT01 (Physiotherapist)</i>                                                                                                                                                                                                                                                                                                                                                                                                                                        |

## Delivering physiotherapy to breast cancer patients

This theme reports views on delivering a new physiotherapist-led intervention for breast cancer patients.

### Meeting the needs of breast cancer patients

Participants and physiotherapists suggested that adjuvant treatment, such as chemotherapy, interfered with the patients' ability to maintain the exercise programme. After stopping the exercises when they felt unwell, it was

physically more difficult to start doing the exercises again. Physiotherapists reflected that intervening at this point may have helped encourage and motivate patients to continue.

The physiotherapists noted that patients needed emotional support, and that it was difficult to provide this in a curtained cubicle in an open-plan space, where patients potentially felt more vulnerable. Two therapists felt that physiotherapists should be female as they would better understand the meaning of losing a breast and more able to engage in the emotional and physical work of treating these patients. This issue was not mentioned by the trial participants we interviewed.

### Emotional support for physiotherapists

Physiotherapists typically provide emotional support to patients, however, some therapists highlighted particular challenges in relation to this patient group due to the context of cancer treatment, for example, patients were fearful of dying from breast cancer. This was in contrast to their usual caseload which often involved caring for musculoskeletal patients with chronic conditions. The physiotherapists felt they would need emotional support if they worked routinely with breast cancer patients.

### Physiotherapists' time, skills, and organisational integration

Delivering the intervention was time-consuming for physiotherapists. Trial appointments were longer than usual and there were doubts about how this could be practically implemented as part of routine NHS clinical care given current time restrictions on appointments. The physiotherapists felt confident in identifying and treating physical shoulder problems, but often expressed a need for training about breast cancer, its treatments, and cancer specific complications. Cording, lymphedema, and seroma were unfamiliar postoperative complications to some physiotherapists until they took part in the trial. Physiotherapists felt disconnected from the surgical or oncology team treating the patient which was challenging. Better integration with the oncology team would have given them greater understanding of the specific patient's treatment schedule as they sometimes felt uncertain about whether the interventions were appropriate at a particular stage of cancer treatment.

Table 4 - Theme 3: Delivering physiotherapy to breast cancer patients

| Subtheme                                    | Supporting quotes                                                                                                                                                                                                                       |
|---------------------------------------------|-----------------------------------------------------------------------------------------------------------------------------------------------------------------------------------------------------------------------------------------|
| Meeting the needs of breast cancer patients | <i>On day 17 after chemotherapy it has been a struggle...the last three weeks with the first lot of chemo this...[doing the exercises has] been a lot harder than I ever anticipated. – QR11 (Age 49, Intervention arm participant)</i> |



|                                                                |                                                                                                                                                                                                                                                                                                                                                                                                                                                                                                                                                                                                                                                                                                                                                                                                                                                                                                                                                                                                                                                                                                                                                                                                                                                                                                                                                                                                                                                                                                                                                                                                                                                                                                                                                              |
|----------------------------------------------------------------|--------------------------------------------------------------------------------------------------------------------------------------------------------------------------------------------------------------------------------------------------------------------------------------------------------------------------------------------------------------------------------------------------------------------------------------------------------------------------------------------------------------------------------------------------------------------------------------------------------------------------------------------------------------------------------------------------------------------------------------------------------------------------------------------------------------------------------------------------------------------------------------------------------------------------------------------------------------------------------------------------------------------------------------------------------------------------------------------------------------------------------------------------------------------------------------------------------------------------------------------------------------------------------------------------------------------------------------------------------------------------------------------------------------------------------------------------------------------------------------------------------------------------------------------------------------------------------------------------------------------------------------------------------------------------------------------------------------------------------------------------------------|
|                                                                | <p><i>Maybe three or four times I was not well and I stopped doing the exercises for three or four days if I was ill and after that it was more difficult to do the exercises after. – QR10 (Age 50, Intervention arm participant)</i></p> <p><i>A patient would come in for their first appointment and probably just post-surgery and most of them were quite positive had quite a lot of goals... they'd start their chemotherapy and then it was a whole different ball game because it was just kind of managing their fatigue and we struggled to get people back in for appointments. – PT02 (Physiotherapist)</i></p> <p><i>I think one of the things if I was to launch a service based on this intervention I would try and get a private treatment room 'cause we're working in curtained cubicles a lot of the time and I felt that didn't set the tone, I think if you're asking someone to take their bra off then and you can feel y'know curtains move with the best will in the world, not move open necessarily but you have that sense of 'Oh it's just a piece of material between me and God knows who'. – PT10 (Physiotherapist)</i></p> <p><i>They would probably connect better with a female and I was surprised how much women wanted to talk to me about their connection with their breasts so for a lot of them they felt like that was their femininity or that was um a connection to their womanhood and so I think most guys couldn't relate to how that feels so I could get where they were coming from. – PT08 (Physiotherapist)</i></p>                                                                                                                                                                                 |
| Emotional support for physiotherapists                         | <p><i>I am a person who cries quite easily so I was like 'Ok I need to keep things under control myself because I am the professional'... If I was to do it longer term I would need some better kind of guidance and help to deal with that...sometimes I felt a little bit lost. – PT08 (Physiotherapist)</i></p> <p><i>We were lucky because we had each other but there were times where it was upsetting to hear...If we were permanent members of staff in oncology you would be given some...de-briefing or kind of decompression but we were never offered that... both of us have had very close relatives die because of cancer...nobody considered that at all. – PT06 (Physiotherapist)</i></p>                                                                                                                                                                                                                                                                                                                                                                                                                                                                                                                                                                                                                                                                                                                                                                                                                                                                                                                                                                                                                                                  |
| Physiotherapists' time, skills, and organisational integration | <p><i>I would say giving them the choice of exercise is time consuming which you wouldn't have in real life, you wouldn't have the time. – PT09 (Physiotherapist)</i></p> <p><i>We are MSK [musculoskeletal] physios and we know what a tight shoulder is and we know how to get it moving, so actually the assessment and the exercises wasn't so much of a worry, but patients occasionally asked me a question that maybe I couldn't answer...the background behind the cancer, a bit more about the actual surgical techniques they did and why and a little bit more about the reasoning of why lymphedema and cording does actually develop and what it means, I might have benefitted from more training from that aspect. – PT03 (Physiotherapist)</i></p> <p><i>Being able to advise people a bit more around like scar massage or kind of...any of the manual treatments that we could've done and when is right and wrong to use them [was difficult]. – PT02 (Physiotherapist)</i></p> <p><i>There's not necessarily the integration with like the nurses or the lymphedema team, we are quite a separate team from them so I think it does need to be a multi-disciplinary approach and because we're not involved with them it makes it a little bit difficult [to know] whether we should or shouldn't be doing those interventions. – PT03 (Physiotherapist)</i></p> <p><i>I sometimes found it difficult to ask about things like chemo, radiotherapy and repeat surgeries because I almost felt like it was something that I should know... I find that, I feel a bit uncomfortable about that, that I think they come in, and expect, and that's what I'd want as a healthcare professional I want them to know what's going on I</i></p> |

|  |                                                                                                               |
|--|---------------------------------------------------------------------------------------------------------------|
|  | <i>shouldn't have to tell you when I am having my chemo or this is happening.</i> – PT05<br>(Physiotherapist) |
|--|---------------------------------------------------------------------------------------------------------------|

## Discussion

This qualitative study embedded within a large multicentre clinical trial makes a unique contribution to the literature. Previous studies have explored perceptions of exercise in the context of an exercise intervention [31-33], but this is the first to include the perspectives of both intervention and control group participants, as well as physiotherapists delivering the intervention. We gained multiple perspectives on the same issue, and included all stakeholders in the study. By using qualitative methods, we elicited the particular elements of the intervention which helped motivate participants, and those which were easier or more difficult to deliver in the clinical setting. This intervention is the first early structured physiotherapy-led home-based exercise intervention to be tested in breast cancer patients in the UK. An understanding of the acceptability of the intervention to patients and physiotherapists will inform implementation strategies if the intervention is clinically and cost-effective.

Uncertainty has been identified as a feature of the experience of cancer [34, 26]. Seeing improvement for themselves in terms of strength and stretching stood out in sharp contrast with the uncertainty surrounding cancer and its treatment. Participants also gained a sense of control over their progress, through being involved in choosing exercises, and through taking responsibility for completing their exercises each day. This combination appeared to restore patients' sense of autonomy over their bodies, and improved their wellbeing as they felt less disempowered and hopeless. This echoes previous research which found feelings of increased empowerment when breast cancer patients participated in physical activity during active treatment [35-37]. These experiences contrasted to those in the control group, who did not experience the same sense of empowerment and progress. Specific aspects of the intervention which contributed to this sense of control over and above usual care were the contact with physiotherapists and the reassurance this provided, the sense of progress working through the prescribed programme as exercises increased in difficulty, and the shared decision-making used to select the home exercises. Previous research has found that participating in a group activity can be a way of forgetting about the illness [31]. Our study illustrates this can also be true for home-based or individually supported exercise programmes.

1  
2  
3 Being diagnosed with a serious illness such as cancer can cause an individual to lose trust and confidence in their  
4 bodily knowledge and of what their bodies are capable of doing [12, 38-40]. The women in this study reported  
5 kinesiophobia (fear of movement) in the acute period following surgery, but those in the intervention arm felt the  
6 intervention helped them overcome this. Kinesiophobia has been shown to be associated with lymphoedema and  
7 greater pain intensity [41, 42]. Physiotherapists were able to reassure patients that their bodily sensations were  
8 normal, and gave them confidence to push themselves physically which motivated them to adhere to the  
9 programme. The interview data suggested that the role of the physiotherapist in affirming this progress and  
10 confidence was crucial. Physiotherapists provided invaluable emotional support, as patients unburdened onto them  
11 and shared their fears about the future and their bodies.

12  
13  
14  
15  
16  
17  
18  
19  
20  
21 The interviewed physiotherapists enjoyed seeing positive improvements in the participants, and felt passionate  
22 about delivering what they viewed as high quality care to this patient group. Physiotherapists felt satisfaction in  
23 being able to take preventive action against problems arising in the future for these women. Other authors have  
24 called for a more proactive model of health care provision for this patient group, and identified the need to improve  
25 physiotherapists' confidence in supporting these patients [43]. Our physiotherapists felt that they needed better  
26 integration with the rest of the patient's healthcare providers. Other studies have also emphasised the importance  
27 of aligning expectations and knowledge about exercise based rehabilitation across the whole cancer care team [5]  
28 Challenges to the exercise programme were the side effects of treatment, in particular fatigue, which has been  
29 highlighted in other research as a barrier to exercise for breast cancer patients [31]. If a physiotherapist can provide  
30 motivation and encouragement during chemotherapy, this may improve adherence to exercise. However, it is also  
31 important to ensure that physiotherapists are sympathetic to treatment-related issues, and can tailor programmes  
32 during these periods of fatigue [31].

33  
34  
35  
36  
37  
38  
39  
40  
41  
42  
43  
44  
45 The interviews highlighted considerations for the implementation of an exercise intervention for breast cancer  
46 patients. The intervention should be delivered in a private walled room, ideally with a specifically-trained (female)  
47 physiotherapist who is part of the multi-disciplinary oncology team caring for the patient. The most important  
48 ingredient of the intervention was contact with the physiotherapists, suggesting resources should be focused on  
49 training and supporting physiotherapists to provide this care. Some physiotherapists reported feeling upset when  
50 treating patients because of the patients' distress or their own experiences of cancer. This suggests that healthcare  
51 professionals caring for oncology patients should be given the opportunity of debriefing and emotional support.  
52 This is an important consideration when designing future interventions for this patient group.

1  
2  
3 In the PROSPER trial, participants underwent a one hour assessment and then subsequent 30-minute follow-up  
4 appointments. Routine UK physiotherapy outpatient appointments are often 40 minutes (assessment) and 20  
5 minutes (follow-up). Physiotherapists worked with patients to select the exercises. This may be challenging to  
6 deliver in a resource-stretched NHS context. However, longer appointments with physiotherapists, creating shared  
7 goals, and making shared decisions about exercises, were viewed as the most important ingredients in the  
8 successful delivery of the intervention. Other studies have highlighted how autonomy of choice over exercises  
9 may increase motivation and adherence [32, 44]. Additionally, we provided the PROSPER materials in an  
10 attractive ring binder with colour photographs, laminated sheets, and provided exercise diary handouts. Patient-  
11 participants said the diary was useful as a prompt to remember to do their exercises, and it was helpful to see  
12 photographs of the exercises.  
13  
14  
15  
16  
17  
18  
19  
20  
21  
22

23 Acting more proactively by providing good access to physiotherapy treatment early after, or alongside, breast  
24 cancer treatment could help to reduce the number of patients with cancer presenting with musculoskeletal  
25 complications [45]. Although our physiotherapist-participants felt very comfortable with aspects of the  
26 intervention such as improving shoulder mobility, they expressed a need for greater training, support, and  
27 guidance in relation to specific issues such as cording and lymphoedema. The physiotherapists delivering the  
28 PROSPER intervention were musculoskeletal specialists with limited experience in treating patients in the acute  
29 postoperative period. Physiotherapists in the UK receive little training in rehabilitation following cancer treatment,  
30 reflected by the limited centres across the UK with physiotherapists specialised in oncology [45]. Given the  
31 increasing number of people surviving cancer and living with the consequences of cancer treatment, there is an  
32 urgent need in the UK to upskill physiotherapists in cancer-related rehabilitation to allow patients better access to  
33 this type of rehabilitation.  
34  
35  
36  
37  
38  
39  
40  
41  
42  
43  
44  
45

## 46 Conclusion

47  
48  
49 Cancer treatment is an essentially disempowering experience. This study has highlighted how a physiotherapist-  
50 led home exercise programme, with built-in progression and shared decision-making, can help patients  
51 undergoing breast cancer treatment to feel a restored sense of control over their wellbeing.  
52  
53  
54  
55  
56  
57  
58  
59  
60

## Author statement

JB is Chief Investigator of the PROSPER Trial. JB/SR/EW/HR/BM contributed to the study protocol. SR collected and analysed the data. JB/BM/HR/JB/EW assisted with analysis and interpretation. SR led the writing of the paper, and all other authors contributed to writing and editing.

## Funding

Funding for the PROSPER trial was provided by the Health Technology Assessment programme of the National Institute for Health Research (NIHR) (Project Number 13/84/10). JB is supported by NIHR Research Capability Funding via University Hospitals Coventry and Warwickshire. EW is supported by the NIHR Applied Research Collaboration Oxford and Thames Valley.

## Conflicts of interest

The authors have no conflicts of interest.

## Data availability statement

The datasets generated during and/or analysed during the current study are not publicly available due to the need to protect the identity of participants.

## Patient and Public Involvement

Patients partnered with us for the design of the study, the informational material to support the qualitative research, and the burden of the interview from the patient's perspective.

## Acknowledgements

We would like to thank all the physiotherapists and trial participants who took part in this interview study. We dedicate this paper to Elizabeth (Lizzie) Abbey (nee Fort) who passed away on 3rd April 2018. Lizzie helped set up the trial and was a highly valued member of the PROSPER team.

## References

1. McNeely ML, Campbell K, Ospina M, Rowe BH, Dabbs K, Klassen TP et al. Exercise interventions for upper-limb dysfunction due to breast cancer treatment. *Cochrane Database Syst Rev.* 2010(6). doi:10.1002/14651858.CD005211.pub2.
2. Mejdahl MK, Andersen KG, Gärtner R, Kroman N, Kehlet H. Persistent pain and sensory disturbances after treatment for breast cancer: six year nationwide follow-up study. *BMJ.* 2013;346:f1865.
3. Cardoso F, Kyriakides S, Ohno S, Penault-Llorca F, Poortmans P, Rubio IT et al. Early breast cancer: ESMO Clinical Practice Guidelines for diagnosis, treatment and follow-up. *Ann Oncol.* 2019. doi:10.1093/annonc/mdz173.
4. Excellence NfC. Early and locally advanced breast cancer: diagnosis and management NICE guideline [NG101]. 2018. <https://www.nice.org.uk/guidance/ng101/chapter/Recommendations>. Accessed 31st January 2020.
5. Dennett AM, Harding KE, Reed MS. The challenge of timing: a qualitative study on clinician and patient perspectives about implementing exercise-based rehabilitation in an acute cancer treatment setting. *Support Care Cancer.* 2020. doi:10.1007/s00520-020-05436-7.
6. Fisher MI, Howell D. The power of empowerment: An ICF-based model to improve self-efficacy and upper extremity function of survivors of breast cancer. *Rehabil Oncol.* 2010;28(3).
7. Dunn J, Steginga SK. Young women's experience of breast cancer: defining young and identifying concerns. *Psychooncology.* 2000;9(2):137-46.
8. Thomas-MacLean R. Memories of treatment: the immediacy of breast cancer. *Qual Health Res.* 2004;14(5):628-43. doi:10.1177/1049732304263658.
9. Little M, Jordens CF, Paul K, Montgomery K, Philipson B. Liminality: a major category of the experience of cancer illness. *Soc Sci Med.* 1998;47(10):1485-94.
10. McCann L, Illingworth N, Wengström Y, Hubbard G, Kearney N. Transitional experiences of women with breast cancer within the first year following diagnosis. *J Clin Nurs.* 2010;19(13-14):1969-76.
11. Trusson D, Pilnick A, Roy S. A new normal?: Women's experiences of biographical disruption and liminality following treatment for early stage breast cancer. *Soc Sci Med.* 2016.
12. Rees S. No one scans you and says 'you're alright now': the experience of embodied risk for young women living with a history of breast cancer. *Health, Risk & Society.* 2018;1-13. doi:10.1080/13698575.2018.1539468.
13. Bruce J, Williamson E, Lait C, Richmond H, Betteley L, Lall R et al. Randomised controlled trial of exercise to prevent shoulder problems in women undergoing breast cancer treatment: study protocol for the prevention of shoulder problems trial (UK PROSPER). *BMJ Open.* 2018;8(3):e019078. doi:10.1136/bmjopen-2017-019078.
14. Richmond H, Lait C, Srikesavan C, Williamson E, Moser J, Newman M et al. Development of an exercise intervention for the prevention of musculoskeletal shoulder problems after breast cancer treatment: the prevention of shoulder problems trial (UK PROSPER). *BMC Health Serv Res.* 2018;18(1):463. doi:10.1186/s12913-018-3280-x.
15. Archer MS. *Realist social theory: The morphogenetic approach.* Cambridge University Press; 1995.
16. Bhaskar R. *A realist theory of science.* Routledge; 2013.
17. Braun V, Clarke V. Reflecting on reflexive thematic analysis. *Qualitative Research in Sport, Exercise and Health.* 2019;11(4):589-97. doi:10.1080/2159676X.2019.1628806.
18. O'Brien BC, Harris IB, Beckman TJ, Reed DA, Cook DAJAM. Standards for reporting qualitative research: a synthesis of recommendations. 2014;89(9):1245-51.
19. Ltd QIP. NVivo qualitative data analysis software. QSR International Pty Ltd. Stockholm, Sweden; 2008.

20. Guest G, MacQueen KM, Namey EE. *Applied thematic analysis*. Sage; 2011.
21. Boyatzis RE. *Transforming qualitative information: Thematic analysis and code development*. sage; 1998.
22. Charmaz K. *Constructing grounded theory*. Sage; 2014.
23. Braun V, Clarke V. To saturate or not to saturate? Questioning data saturation as a useful concept for thematic analysis and sample-size rationales. *Qualitative Research in Sport, Exercise and Health*. 2019;1-16. doi:10.1080/2159676X.2019.1704846.
24. Hennink MM, Kaiser BN, Marconi VCJQhr. Code saturation versus meaning saturation: how many interviews are enough? 2017;27(4):591-608.
25. Rees S. A qualitative exploration of the meaning of the term “survivor” to young women living with a history of breast cancer. *European journal of cancer care*. 2018;27(3):e12847.
26. Rees S. ‘Am I really gonna go sixty years without getting cancer again?’ Uncertainty and liminality in young women’s accounts of living with a history of breast cancer. *Health*. 2017;21(3):241–58. doi:10.1177/1363459316677628.
27. Rees S, Young A. The experiences and perceptions of women diagnosed with breast cancer during pregnancy. *Asia-Pacific journal of oncology nursing*. 2016;3(3):252-8. doi:10.4103/2347-5625.189814.
28. Hutchinson A, Rees S, Young A, Maraveyas A, Date K, Johnson MJ. Oral anticoagulation is preferable to injected, but only if it is safe and effective: An interview study of patient and carer experience of oral and injected anticoagulant therapy for cancer-associated thrombosis in the select-d trial. *Palliat Med*. 2019;33(5):510-7.
29. Lincoln YS, Guba EG. But is it rigorous? Trustworthiness and authenticity in naturalistic evaluation. *New directions for program evaluation*. 1986;1986(30):73-84.
30. Trusson D. *Living with a new normal: women’s experiences following treatment for early-stage breast cancer or DCIS*: University of Nottingham; 2013.
31. Browall M, Mijwel S, Rundqvist H, Wengstrom Y. Physical Activity During and After Adjuvant Treatment for Breast Cancer: An Integrative Review of Women’s Experiences. *Integr Cancer Ther*. 2018;17(1):16-30. doi:10.1177/1534735416683807.
32. Ingram C, Wessel J, Courneya KS. Women’s perceptions of home-based exercise performed during adjuvant chemotherapy for breast cancer. *Eur J Oncol Nurs*. 2010;14(3):238-43. doi:10.1016/j.ejon.2010.01.027.
33. Luoma ML, Hakamies-Blomqvist L, Blomqvist C, Nikander R, Gustavsson-Lilius M, Saarto T. Experiences of breast cancer survivors participating in a tailored exercise intervention -a qualitative study. *Anticancer Res*. 2014;34(3):1193-9.
34. Halliday LE, Boughton MA, Kerridge I. Mothering and self-othering: The impact of uncertain reproductive capability in young women after hematological malignancy. *Health Care Women Int*. 2014;35(3):249-65.
35. Husebo AM, Karlsen B, Allan H, Soreide JA, Bru E. Factors perceived to influence exercise adherence in women with breast cancer participating in an exercise programme during adjuvant chemotherapy: a focus group study. *J Clin Nurs*. 2015;24(3-4):500-10. doi:10.1111/jocn.12633.
36. Crane-Okada R, Kiger H, Anderson NL, Carroll-Johnson RM, Sugerman F, Shapiro SL et al. Participant perceptions of a mindful movement program for older women with breast cancer: focus group results. *Cancer Nurs*. 2012;35(3):E1-10. doi:10.1097/NCC.0b013e31822539c5.
37. Bulmer SM, Howell J, Ackerman L, Fedric R. Women’s perceived benefits of exercise during and after breast cancer treatment. *Women Health*. 2012;52(8):771-87. doi:10.1080/03630242.2012.725707.
38. Williams SJ. The vicissitudes of embodiment across the chronic illness trajectory. *Body & Society*. 1996;2(2):23-47.
39. Lindwall L, Bergbom I. The altered body after breast cancer surgery. *International Journal of Qualitative Studies on Health and Well-being*. 2009;4(4):280-7.
40. Crouch M, McKenzie H. Social realities of loss and suffering following mastectomy. *Health*. 2000;4(2):196-215.
41. Gencay Can A, Can SS, Ekşioğlu E, Çakıcı FA. Is kinesiophobia associated with lymphedema, upper extremity function, and psychological morbidity in breast cancer survivors? *Turkish journal of physical medicine and rehabilitation*. 2018;65(2):139-46. doi:10.5606/tftrd.2019.2585.
42. Martinez-Calderon J, Struyf F, Meeus M, Luque-Suarez A. The association between pain beliefs and pain intensity and/or disability in people with shoulder pain: A systematic review. *Musculoskelet Sci Pract*. 2018;37:29-57. doi:10.1016/j.msksp.2018.06.010.
43. Levangie PK, Santasier AM, Stout NL, Pfalzer L. A qualitative assessment of upper quarter dysfunction reported by physical therapists treated for breast cancer or treating breast cancer sequelae. *Support Care Cancer*. 2011;19(9):1367-78. doi:10.1007/s00520-010-0959-x.
44. Jones LW, Courneya KS, Fairey AS, Mackey JR. Does the theory of planned behavior mediate the effects of an oncologist’s recommendation to exercise in newly diagnosed breast cancer survivors? Results from a randomized controlled trial. *Health Psychol*. 2005;24(2):189.

1  
2  
3 45. Robinson M, Ward L, Mehanna H, Paleri V, Winter SC. Provision of physiotherapy rehabilitation following  
4 neck dissection in the UK. The Journal of Laryngology & Otology. 2018;132(7):624-7.  
5 doi:10.1017/S0022215118000671.  
6  
7  
8  
9  
10  
11  
12  
13  
14  
15  
16  
17  
18  
19  
20  
21  
22  
23  
24  
25  
26  
27  
28  
29  
30  
31  
32  
33  
34  
35  
36  
37  
38  
39  
40  
41  
42  
43  
44  
45  
46  
47  
48  
49  
50  
51  
52  
53  
54  
55  
56  
57  
58  
59  
60

For peer review only



# Reporting checklist for qualitative study.

Based on the SRQR guidelines.

## Instructions to authors

Complete this checklist by entering the page numbers from your manuscript where readers will find each of the items listed below.

Your article may not currently address all the items on the checklist. Please modify your text to include the missing information. If you are certain that an item does not apply, please write "n/a" and provide a short explanation.

Upload your completed checklist as an extra file when you submit to a journal.

In your methods section, say that you used the SRQR reporting guidelines, and cite them as:

O'Brien BC, Harris IB, Beckman TJ, Reed DA, Cook DA. Standards for reporting qualitative research: a synthesis of recommendations. *Acad Med.* 2014;89(9):1245-1251.

|                              | Reporting Item                                                                                                                                                                                                                                          | Page Number |
|------------------------------|---------------------------------------------------------------------------------------------------------------------------------------------------------------------------------------------------------------------------------------------------------|-------------|
| <b>Title</b>                 |                                                                                                                                                                                                                                                         |             |
|                              | <a href="#">#1</a> Concise description of the nature and topic of the study identifying the study as qualitative or indicating the approach (e.g. ethnography, grounded theory) or data collection methods (e.g. interview, focus group) is recommended |             |
| <b>Abstract</b>              |                                                                                                                                                                                                                                                         |             |
|                              | <a href="#">#2</a> Summary of the key elements of the study using the abstract format of the intended publication; typically includes background, purpose, methods, results and conclusions                                                             |             |
| <b>Introduction</b>          |                                                                                                                                                                                                                                                         |             |
| Problem formulation          | <a href="#">#3</a> Description and significance of the problem / phenomenon studied: review of relevant theory and empirical work; problem statement                                                                                                    |             |
| Purpose or research question | <a href="#">#4</a> Purpose of the study and specific objectives or questions                                                                                                                                                                            |             |

## 1 **Methods**

- 2
- 3 Qualitative approach and [#5](#) Qualitative approach (e.g. ethnography, grounded theory, case  
4 research paradigm study, phenomenology, narrative research) and guiding theory if  
5 appropriate; identifying the research paradigm (e.g.  
6 postpositivist, constructivist / interpretivist) is also  
7 recommended; rationale. The rationale should briefly discuss  
8 the justification for choosing that theory, approach, method or  
9 technique rather than other options available; the assumptions  
10 and limitations implicit in those choices and how those choices  
11 influence study conclusions and transferability. As appropriate  
12 the rationale for several items might be discussed together.  
13
- 14
- 15
- 16
- 17
- 18
- 19 Researcher characteristics [#6](#) Researchers' characteristics that may influence the research,  
20 and reflexivity including personal attributes, qualifications / experience,  
21 relationship with participants, assumptions and / or  
22 presuppositions; potential or actual interaction between  
23 researchers' characteristics and the research questions, approach,  
24 methods, results and / or transferability  
25
- 26
- 27
- 28
- 29 Context [#7](#) Setting / site and salient contextual factors; rationale  
30
- 31 Sampling strategy [#8](#) How and why research participants, documents, or events were  
32 selected; criteria for deciding when no further sampling was  
33 necessary (e.g. sampling saturation); rationale  
34
- 35
- 36 Ethical issues pertaining to [#9](#) Documentation of approval by an appropriate ethics review  
37 human subjects board and participant consent, or explanation for lack thereof;  
38 other confidentiality and data security issues  
39
- 40
- 41
- 42 Data collection methods [#10](#) Types of data collected; details of data collection procedures  
43 including (as appropriate) start and stop dates of data collection  
44 and analysis, iterative process, triangulation of sources /  
45 methods, and modification of procedures in response to  
46 evolving study findings; rationale  
47
- 48
- 49
- 50 Data collection instruments [#11](#) Description of instruments (e.g. interview guides,  
51 and technologies questionnaires) and devices (e.g. audio recorders) used for data  
52 collection; if / how the instrument(s) changed over the course  
53 of the study  
54
- 55
- 56
- 57 Units of study [#12](#) Number and relevant characteristics of participants, documents,  
58 or events included in the study; level of participation (could be  
59

reported in results)

- 1  
2  
3 Data processing [#13](#) Methods for processing data prior to and during analysis,  
4 including transcription, data entry, data management and  
5 security, verification of data integrity, data coding, and  
6 anonymisation / deidentification of excerpts  
7  
8  
9 Data analysis [#14](#) Process by which inferences, themes, etc. were identified and  
10 developed, including the researchers involved in data analysis;  
11 usually references a specific paradigm or approach; rationale  
12  
13  
14 Techniques to enhance [#15](#) Techniques to enhance trustworthiness and credibility of data  
15 trustworthiness analysis (e.g. member checking, audit trail, triangulation);  
16 rationale  
17  
18  
19  
20 **Results/findings**  
21  
22 Syntheses and [#16](#) Main findings (e.g. interpretations, inferences, and themes);  
23 interpretation might include development of a theory or model, or integration  
24 with prior research or theory  
25  
26  
27 Links to empirical data [#17](#) Evidence (e.g. quotes, field notes, text excerpts, photographs) to  
28 substantiate analytic findings  
29  
30  
31 **Discussion**  
32  
33  
34 Intergration with prior [#18](#) Short summary of main findings; explanation of how findings  
35 work, implications, and conclusions connect to, support, elaborate on, or challenge  
36 transferability and conclusions of earlier scholarship; discussion of scope of  
37 contribution(s) to the field application / generalizability; identification of unique  
38 contributions(s) to scholarship in a discipline or field  
39  
40  
41  
42 Limitations [#19](#) Trustworthiness and limitations of findings  
43  
44  
45 **Other**  
46  
47 Conflicts of interest [#20](#) Potential sources of influence of perceived influence on study  
48 conduct and conclusions; how these were managed  
49  
50  
51 Funding [#21](#) Sources of funding and other support; role of funders in data  
52 collection, interpretation and reporting  
53

54 None The SRQR checklist is distributed with permission of Wolters Kluwer © 2014 by the Association of  
55 American Medical Colleges. This checklist can be completed online using <https://www.goodreports.org/>, a tool  
56 made by the [EQUATOR Network](#) in collaboration with [Penelope.ai](#)  
57  
58

# BMJ Open

## The role of physiotherapy in supporting recovery from breast cancer treatment: A qualitative study embedded within the UK PROSPER trial

|                                 |                                                                                                                                                                                                                                                                                                                                                                                                                                                                                                                                                                                                                                                                                                                             |
|---------------------------------|-----------------------------------------------------------------------------------------------------------------------------------------------------------------------------------------------------------------------------------------------------------------------------------------------------------------------------------------------------------------------------------------------------------------------------------------------------------------------------------------------------------------------------------------------------------------------------------------------------------------------------------------------------------------------------------------------------------------------------|
| Journal:                        | <i>BMJ Open</i>                                                                                                                                                                                                                                                                                                                                                                                                                                                                                                                                                                                                                                                                                                             |
| Manuscript ID                   | bmjopen-2020-040116.R1                                                                                                                                                                                                                                                                                                                                                                                                                                                                                                                                                                                                                                                                                                      |
| Article Type:                   | Original research                                                                                                                                                                                                                                                                                                                                                                                                                                                                                                                                                                                                                                                                                                           |
| Date Submitted by the Author:   | 06-Oct-2020                                                                                                                                                                                                                                                                                                                                                                                                                                                                                                                                                                                                                                                                                                                 |
| Complete List of Authors:       | Rees, Sophie; University of Warwick, Warwick Clinical Trials Unit<br>Mazuquin, Bruno; University of Warwick, Warwick Clinical Trials Unit;<br>Manchester Metropolitan University, Faculty of Health, Psychology and Social Care<br>Richmond, Helen ; University of Warwick, Warwick Clinical Trials Unit;<br>Memorial University of Newfoundland, Faculty of Medicine<br>Williamson, Esther; Nuffield Department of Orthopaedics, Rheumatology and Musculoskeletal Sciences, University of Oxford, United Kingdom. ,<br>Centre for Rehabilitation Research in Oxford<br>Bruce, Julie; University of Warwick, Warwick Clinical Trials Unit<br>-, UK PROSPER Study Group; University of Warwick, Warwick Clinical Trials Unit |
| <b>Primary Subject Heading</b>: | Oncology                                                                                                                                                                                                                                                                                                                                                                                                                                                                                                                                                                                                                                                                                                                    |
| Secondary Subject Heading:      | Qualitative research, Surgery                                                                                                                                                                                                                                                                                                                                                                                                                                                                                                                                                                                                                                                                                               |
| Keywords:                       | QUALITATIVE RESEARCH, Breast surgery < SURGERY, PREVENTIVE MEDICINE                                                                                                                                                                                                                                                                                                                                                                                                                                                                                                                                                                                                                                                         |
|                                 |                                                                                                                                                                                                                                                                                                                                                                                                                                                                                                                                                                                                                                                                                                                             |

SCHOLARONE™  
Manuscripts



I, the Submitting Author has the right to grant and does grant on behalf of all authors of the Work (as defined in the below author licence), an exclusive licence and/or a non-exclusive licence for contributions from authors who are: i) UK Crown employees; ii) where BMJ has agreed a CC-BY licence shall apply, and/or iii) in accordance with the terms applicable for US Federal Government officers or employees acting as part of their official duties; on a worldwide, perpetual, irrevocable, royalty-free basis to BMJ Publishing Group Ltd ("BMJ") its licensees and where the relevant Journal is co-owned by BMJ to the co-owners of the Journal, to publish the Work in this journal and any other BMJ products and to exploit all rights, as set out in our [licence](#).

The Submitting Author accepts and understands that any supply made under these terms is made by BMJ to the Submitting Author unless you are acting as an employee on behalf of your employer or a postgraduate student of an affiliated institution which is paying any applicable article publishing charge ("APC") for Open Access articles. Where the Submitting Author wishes to make the Work available on an Open Access basis (and intends to pay the relevant APC), the terms of reuse of such Open Access shall be governed by a Creative Commons licence – details of these licences and which [Creative Commons](#) licence will apply to this Work are set out in our licence referred to above.

Other than as permitted in any relevant BMJ Author's Self Archiving Policies, I confirm this Work has not been accepted for publication elsewhere, is not being considered for publication elsewhere and does not duplicate material already published. I confirm all authors consent to publication of this Work and authorise the granting of this licence.

# The role of physiotherapy in supporting recovery from breast cancer treatment: A qualitative study embedded within the UK PROSPER trial

Rees S,<sup>1</sup> Mazuquin B,<sup>1,2</sup> Richmond H,<sup>1,3</sup> Williamson E,<sup>4</sup> Bruce J.<sup>1</sup> on behalf of the UK PROSPER Study Group<sup>1</sup>

<sup>1</sup>Warwick Clinical Trials Unit, University of Warwick Medical School, Coventry, UK CV4 7AL

<sup>2</sup>Faculty of Health, Psychology and Social Care, Manchester Metropolitan University

<sup>3</sup>Faculty of Medicine, Memorial University of Newfoundland, St John's, Canada

<sup>4</sup>The Centre for Rehabilitation Research, Nuffield Department of Orthopaedics, Rheumatology and Musculoskeletal Sciences, University of Oxford

Corresponding author:

Dr Sophie Rees

[S.Rees.1@warwick.ac.uk](mailto:S.Rees.1@warwick.ac.uk)

02476 151 135

## Abstract

**Objectives:** To explore breast cancer patients' experience of taking part in an early physiotherapy-led exercise intervention compared with the experiences of those receiving usual care. To understand physiotherapists' experience of delivering the trial intervention. To explore issues related to the implementation of the PROSPER programme from participant and physiotherapist perspective.

**Design:** Qualitative audio-recorded semi-structured interviews with thematic analysis.

**Setting:** UK National Health Service (NHS)

**Participants:** Twenty participants at high risk of shoulder problems after breast cancer surgery, recruited to the UK Prevention of Shoulder Problems (PROSPER) Trial (ten each from the intervention arm and control arm respectively); and eleven physiotherapists who delivered the intervention. Trial participants were sampled using convenience sampling. Physiotherapists were purposively sampled from high and low recruiting sites.

**Results:** Participants described that the PROSPER exercise intervention helped them feel confident in what their body could do, and helped them regain a sense of control in the context of cancer treatment which was largely disempowering. Control arm participants expressed less of a sense of control over their wellbeing.

1  
2  
3 Physiotherapists found the exercise intervention enjoyable to deliver and felt it was valuable to their patients. The  
4 extra time allocated to patients during intervention delivery made physiotherapists feel they were providing  
5 optimal care, being the 'perfect physio'. Lessons were learned about the implementation of a complex exercise  
6  
7 intervention for breast cancer patients and the issues raised will inform the development of a future  
8  
9 implementation strategy.  
10  
11

12  
13 **Conclusions:** A physiotherapist-delivered early supported exercise intervention with integrated behavioural  
14 strategies helped women at risk of shoulder problems following breast cancer treatment to regain control and feel  
15 more confident in their ability to mobilise their arm post-surgery. A physiotherapist-delivered early supported  
16  
17 exercise intervention with integrated behavioural strategies may address the sense of powerlessness that many  
18  
19 patients experience during cancer treatment.  
20  
21

22  
23  
24 **Keywords:** *breast cancer; physiotherapy; rehabilitation; prevention; shoulder; qualitative research*  
25

#### 26 **Acknowledgements**

27

28  
29 This study was embedded within a multicentre UK randomised controlled trial (ISCRN35358984) and was  
30 funded by the National Institute for Health Research Health Technology Assessment Programme (HTA 13/84/10).  
31  
32 The research team would like to thank the trial participants and physiotherapists who participated in the qualitative  
33  
34 study.  
35  
36

37 **Word count:** 6,259 (due to quotes being included in word count)  
38  
39  
40  
41  
42  
43  
44  
45  
46  
47  
48  
49  
50  
51  
52  
53  
54  
55  
56  
57  
58  
59  
60

## Article Summary

### Strengths and limitations of this study

- Interviewing multiple groups (intervention arm, control arm participants, and physiotherapists) in this study enabled us to triangulate the data and explore experiences from multiple perspectives.
- We note that the participants we interviewed were a particularly motivated group, and it is possible we did not capture some of the challenges which other, less motivated, women may have experienced.
- We obtained consent to be approached for interview prior to randomisation, independent of treatment allocation, in an attempt to minimise bias. We tried to minimise the risk of social desirability bias by asking neutral questions and explaining there were no right or wrong answers
- We used a convenience sampling approach, which is a potential weakness of this study as it may have resulted in a lack of diversity amongst participants.
- Our sample was overwhelmingly white, with only one of the participants identifying as another ethnic identity. Findings may not reflect the experiences of black, Asian and other minority ethnic groups.

## Introduction

Treatment to the chest and axilla for breast cancer can result in upper body problems, such as reduced range of movement in the shoulder, muscle weakness, pain, lymphoedema, and functional limitations [1, 2]. These problems can impact on ability to carry out activities of daily living, and may persist for many years after treatment [1, 2]. Exercise in the acute phase following breast cancer surgery may improve shoulder function in women at high risk of shoulder problems [1]. Guidelines state that breast cancer patients should be referred to physiotherapy when indicated [3, 4], however, in the UK NHS this is not routine practice. There is a need for a proactive model of care which encourages early exercise-based rehabilitation and provides physiotherapists with resources to inform their practice [5]. Loss of a sense of control, loss of self-identity, and alienation from their bodies during and after treatment are often reported by breast cancer patients [6-12]. It has been proposed that improving women's self-efficacy through physical rehabilitation may improve their quality of life [6]. Lack of knowledge about exercise, and the experience of cancer-related fatigue were identified as obstacles to exercise in a recent



1  
2  
3 study of Korean patients [13]. A recent systematic review of the qualitative literature identified six studies of  
4 mixed quality reporting the experiences of women living beyond breast cancer of participating in a supervised  
5 exercise intervention [14]. These studies all reported on group interventions, and the findings suggest that the  
6 group element may be beneficial. Little is known about the experiences of this patient group participating in  
7 individual supported exercise intervention. There has also been little published regarding the experiences of  
8 professionals delivering exercise interventions to this patient group. One recent study reported a lack of confidence  
9 amongst physiotherapists in treating cancer patients, but respondents felt confidence grew with practice [15].  
10 Little is known about how physiotherapists feel about the feasibility of implementing a service for people with  
11 breast cancer. This is important so that we can address challenges and issues when designing services.

12  
13  
14  
15  
16  
17  
18  
19  
20  
21 The UK Prevention Of Shoulder Problems (PROSPER) Trial evaluated the clinical and cost-effectiveness of an  
22 early supported home-based physiotherapist-led exercise intervention in women with newly diagnosed breast  
23 cancer at higher risk of developing shoulder problems after treatment [16, 17]. A description of the intervention  
24 and trial protocol have been published [16, 17]. This paper reports the findings of the UK PROSPER trial  
25 embedded qualitative study.

26  
27  
28  
29  
30  
31 The aims of the qualitative study were:

- 32 • To understand the acceptability of the exercise intervention to participants
- 33 • To explore how the exercise intervention or control affected their experiences of recovery after cancer  
34 treatment.
- 35 • To investigate the experiences of physiotherapists delivering the exercise intervention.
- 36 • To explore participants' and physiotherapists' perspectives on issues related to the implementation of the  
37 PROSPER programme to inform future plans for implementation. .

38  
39  
40  
41  
42  
43  
44  
45  
46  
47  
48  
49 Figure 1 illustrates the pathway of participants through the trial and embedded qualitative study.

50  
51  
52  
53  
54 *Figure 1 - Participant pathway through trial and qualitative study*

## Methods

### Methodology

The study was underpinned by critical realism, assuming that an underlying reality is experienced and given meaning by individuals [18, 19]. To meet the study aims, we conducted qualitative semi-structured interviews with reflexive thematic analysis [20]. This allowed for exploration, depth, and understanding of the experiences of trial participants, thus taking an interpretive ‘sense-making’ approach rather than hypothesis-testing or confirmatory approach. We used the SRQR reporting guidelines checklist [21].

### Sampling and recruitment

#### *Trial participant interviews*

On recruitment to the trial, we offered all trial participants the option to take part in an interview at a later date (see Figure 1). We recorded signed consent to be approached for interview and this formed our sampling frame for the qualitative study. Women in the intervention arm were approached after they were discharged from physiotherapy to avoid contamination bias. The researcher (SR) telephoned participants to invite them to interview, and, if they expressed an interest, participants were sent an information sheet and interview consent form.

After conducting and analysing seven interviews with intervention participants, we decided to interview control arm participants, to compare their experiences. We used our database of those who had consented pre-randomisation to select a sample comparable to the intervention sample in terms of time since randomisation, so that women were at similar stages of postoperative treatment and could reflect back over their experiences of recovery.

#### *Physiotherapist interviews*

All physiotherapists delivering the intervention were informed about the interview study. We then sampled physiotherapists from low and high recruiting trial sites to allow exploration of different perspectives on intervention delivery. Therapists were approached by the researcher via email or telephone.

## Data collection

Flexible topic guides were developed by the research team and with breast cancer patients, based on the aims of the study and relevant literature. One-off interviews were conducted either at the participant's home, by telephone (trial participants), or in a private room at their place of work (physiotherapists). Physiotherapists who worked together were interviewed in pairs. The physiotherapists who volunteered for the interviews worked closely together. Interviewing them in pairs allowed physiotherapists to share and reflect on their experiences, and aided recall where they had only treated a small number of participants, for example. It is possible that interviewing them in pairs could have affected their responses, but participants were remarkably candid about the challenges they experienced, thus we were not concerned that this was happening. Only the researcher and interviewees were present. All interviews were audio-recorded. We took study materials (physiotherapy manual, participant materials) into the interview to aid recall and discussion. Informed consent was gained before the interview began. The study was approved by the National Research Ethics Service Committee West Midlands Solihull on 20<sup>th</sup> July 2015 (Ref no. 15/WM/0224),

## Data analysis

Interviews were transcribed verbatim, checked for accuracy and anonymity by the researcher (SR), and then uploaded to QSR NVivo Pro 11 [22]. Thematic analysis [23, 24] was conducted by SR and managed in NVivo. Interview transcripts were 'coded', where sections of text are assigned a descriptive label, producing dozens of codes per interview. These codes were then grouped into categories, and these were then grouped further into themes. Analysis began alongside data collection. The research team met regularly to discuss emerging findings and the evolving analysis [25]. Saturation in this study meant that we had enough data to understand each of the identified categories and themes, rather than that there was 'nothing new' to be found [26, 27]. We reached saturation after fifteen trial participant interviews, and five physiotherapist interviews.

## Reflexivity and rigour

Interviews were conducted sensitively by a female researcher experienced in interviewing cancer patients (SR) [12, 28-31]. The evolving analysis was discussed with the research team (SR/JB/HR/BM). SR is a social scientist with expertise in qualitative research with people with health conditions, including breast cancer, and healthcare professionals. HR and BM are researchers and physiotherapists. JB is a trialist and PROSPER Chief Investigator,

1  
2  
3 she did not influence the qualitative study findings, but provided important contextual details regarding the trial  
4 and intervention. We were careful to conduct balanced interviews, without assuming that the trial participants and  
5 physiotherapists would have positive views of the intervention. SR reminded interviewees throughout that she  
6 was not involved in the development of the intervention, and welcomed their honest views. Rigour was assessed  
7 using Lincoln and Guba's conceptualisation of trustworthiness [32]. SR collected the data and was immersed in  
8 the data during analysis. Quotes have been provided to illustrate themes.  
9  
10  
11  
12  
13  
14  
15

## 16 Results

### 21 Sample

22  
23  
24 We recruited 392 women (196 per arm) to the PROSPER clinical trial from 17 breast cancer centres in England.  
25 Overall, 67% (n=264/392) of trial participants provided signed consent to be contacted for an interview. In total,  
26 we attempted to contact 53 women regarding an interview. Of these, 11 were not contactable, 17 agreed initially  
27 for an interview but could not be reached again, and five declined. Ten participants from the intervention arm and  
28 ten from the control arm were interviewed from 11 of the 17 study sites (see Table 1). There were no apparent  
29 differences between the sites regarding the issues raised by trial participants and therapists. We had a good range  
30 in terms of size and rural/urban sites across the 11 sites represented in the interview study.  
31  
32  
33  
34  
35  
36

37  
38 Interviews were carried out with 11/44 (25%) physiotherapists (all female) from six study sites. All therapists had  
39 attended a training day which included prescribing the exercises as well as behaviour change techniques to  
40 encourage adherence with the programme. Motivational Interviewing techniques were included along with case  
41 studies to demonstrate putting these skills into practice. Ten were interviewed in pairs and one individually. The  
42 physiotherapists had treated between one and 16 trial participants (median 5) and were based at hospitals that did  
43 not routinely provide postoperative physiotherapy after breast cancer surgery. They were experienced in the  
44 management of musculoskeletal conditions but did not currently work in breast cancer or oncology units. Some  
45 physiotherapists had experience of treating breast cancer patients presenting with problems such as restricted  
46 shoulder movement preventing the start of radiotherapy. One physiotherapist had past experience working on a  
47 cancer inpatient ward.  
48  
49  
50  
51  
52  
53  
54  
55  
56  
57  
58  
59  
60

Table 1 - Study sample (trial participants)

| Characteristic                          | Intervention arm N=10 | Control arm N=10 |
|-----------------------------------------|-----------------------|------------------|
| Months since randomisation, mean(range) | 7 (3-11)              | 7 (3-12)         |
| Age at randomisation, mean (range)      | 51 (28-69)            | 60 (44-79)       |
| Age at randomisation                    |                       |                  |
| 18-29                                   | 1                     | 0                |
| 30-39                                   | 0                     | 0                |
| 40-49                                   | 4                     | 2                |
| 50-59                                   | 3                     | 3                |
| 60-69                                   | 2                     | 3                |
| 70-79                                   | 0                     | 2                |
| Ethnicity                               |                       |                  |
| White                                   | 9                     | 10               |
| Mixed                                   | 1                     | 0                |
| Surgical treatment*                     |                       |                  |
| Mastectomy                              | 4                     | 3                |
| Breast conserving surgery               | 6                     | 7                |
| Axillary node clearance                 | 10                    | 8                |
| Sentinel lymph node biopsy              | 3                     | 4                |
| Adjuvant therapy*                       |                       |                  |
| Chemotherapy                            | 9                     | 7                |
| Radiotherapy                            | 9                     | 10               |

\*participants had multiple treatments

We identified three themes from the data: 'healing'; 'being the perfect therapist'; and 'delivering physiotherapy to breast cancer patients'. The themes and subthemes are illustrated by participant group in Table 2, and each theme is described below with subthemes.

Table 2 - Illustration of themes and subthemes by participant group

| Theme                                              | Subtheme                                                       | Intervention group                                                                                                                                                                   | Control group                                                                                         | Physiotherapists                                                                                                                                                                                                                                                                                                                                                                                                                                                               |
|----------------------------------------------------|----------------------------------------------------------------|--------------------------------------------------------------------------------------------------------------------------------------------------------------------------------------|-------------------------------------------------------------------------------------------------------|--------------------------------------------------------------------------------------------------------------------------------------------------------------------------------------------------------------------------------------------------------------------------------------------------------------------------------------------------------------------------------------------------------------------------------------------------------------------------------|
| Healing                                            | Reassurance                                                    | <i>The physiotherapist was able to tell you whether you were doing things right or wrong</i>                                                                                         | <i>It's quite tender...you don't feel like you ought to be doing it...you feel like it's too soon</i> | <i>They think they're going to split their stitches...it's just the reassurance we give</i>                                                                                                                                                                                                                                                                                                                                                                                    |
|                                                    | Making progress                                                | <i>You saw results and sometimes with your cancer...you don't see results until the end</i>                                                                                          | <i>I'm tender but I suppose that will go</i>                                                          |                                                                                                                                                                                                                                                                                                                                                                                                                                                                                |
|                                                    | Helping myself                                                 | <i>I think it was because you were doing something, because so much of cancer care is being done to you</i>                                                                          | <i>It still gets stiff now but you just have to deal with it.</i>                                     | <i>This is something that you can do for yourself and your care</i>                                                                                                                                                                                                                                                                                                                                                                                                            |
|                                                    | Looking ahead                                                  | <i>Now I'm just doing the massage for lymphoedema and exercises only if I feel the problem</i>                                                                                       |                                                                                                       |                                                                                                                                                                                                                                                                                                                                                                                                                                                                                |
| Being the 'perfect' therapist                      |                                                                | <i>she asked me how I felt and it was very much about me and my progress</i>                                                                                                         |                                                                                                       | <i>It almost like it made you be the perfect physio and the perfect way you should treat patients but you don't always have time to do that</i>                                                                                                                                                                                                                                                                                                                                |
| Delivering physiotherapy to breast cancer patients | Meeting the needs of breast cancer patients                    | <i>Maybe three or four times I was not well and I stopped doing the exercises for three or four days if I was ill and after that it was more difficult to do the exercises after</i> |                                                                                                       | <i>they'd start their chemotherapy and then it was a whole different ball game because it was just kind of managing their fatigue and we struggled to get people back in for appointments</i>                                                                                                                                                                                                                                                                                  |
|                                                    | Emotional support for physiotherapists                         |                                                                                                                                                                                      |                                                                                                       | <i>there were times where it was upsetting to hear</i>                                                                                                                                                                                                                                                                                                                                                                                                                         |
|                                                    | Physiotherapists' time, skills, and organisational integration |                                                                                                                                                                                      |                                                                                                       | <i>I would say giving them the choice of exercise is time consuming which you wouldn't have in real life, you wouldn't have the time</i><br><br><i>There's not necessarily the integration with like the nurses or the lymphedema team, we are quite a separate team</i><br><br><i>Being able to advise people a bit more around like scar massage or kind of...any of the manual treatments that we could've done and when is right and wrong to use them [was difficult]</i> |

## Healing

## Reassurance

In the acute period after surgery, participants from both the intervention and control groups reported feeling afraid to move their upper body. This is known as kinesiophobia [33, 34]. They felt unable to do the exercises prescribed in the Breast Cancer Care information leaflet.

*It's quite tender...you don't feel like you ought to be doing it...you feel like it's too soon...I was aching so much that I just thought 'I just can't do this'.* – Qualitative Respondent (QR24) (Age 51, Control arm participant)

*Because you don't know whether it's good or not, do you know what I mean, you don't know if you're doing well or not or if this is where you would be, you know, or you should be and it was quite nice because you got 'oh no you're doing really well' or 'oh yeah that will be tight' and it was that... it was quite nice to have the feedback* – QR12 (Age 55, Intervention arm participant)

*They think they're going to split their stitches if they stretch them up. So it's just the reassurance and guidance we give them.* – PT09 (Physiotherapist)

Participants allocated to the intervention arm subsequently felt reassured by physiotherapists that they were capable and able to move. They felt reassured that bodily sensations, such as stiffness, were normal and not something to worry about. Physiotherapists felt that they were able to increase participants' confidence in moving their bodies, and that this lifted participants' confidence more broadly.

*The, er, physiotherapist...was able to tell you whether you were doing things right or wrong or how things were going within your body.* – QR09 (Age 69, Intervention arm participant)

Interviewer: What do you think they get out of coming to see you?

PT02 (Physiotherapist): *I think confidence. Confidence to actually move...confidence to look after themselves, that they can do things*

1  
2  
3 *Some people it completely changed their kind of outlook on what they could achieve...it was really*  
4 *encouraging for me to see like you'd given them a new lease of life or like a new hopefulness about what*  
5 *they could achieve in the future. – PT08 (Physiotherapist)*  
6  
7  
8

9 Some described this as giving participants 'permission' to move, which was necessary to prevent movement  
10 restrictions in the upper body.  
11  
12

### 13 Making progress

14  
15  
16  
17 This theme refers to physical improvements felt by participants in the intervention arm. This included how far  
18 they could stretch and how strong they were. Improvements were measurable and tangible, and participants  
19 highlighted the central role of the physiotherapist in creating this sense of progress.  
20  
21  
22

23  
24 *You saw results and sometimes with your cancer...you don't see results until the end 'til they say*  
25 *'You're all clear' you are just going through awful, awful, awful praying and hoping...But it is a really*  
26 *positive thing to think 'Oh something is getting better'. – QR12 (Age 55, Intervention arm participant,*  
27 *participant's emphasis)*  
28  
29  
30

31  
32 *You could kind of measure it yourself and assess it yourself because you knew how far you could get your*  
33 *arm up...You could feel when, when things started to get a bit better. – QR08 (Age 43, Intervention arm*  
34 *participant)*  
35  
36  
37

38  
39 *Having those meetings with somebody and seeing the progress that I was making and having her tell*  
40 *me, you know, 'Yeah this is great and now try this' and then having different exercises it kind of made*  
41 *it better for me. – QR13 (Age 28, Intervention arm participant)*  
42  
43  
44

45 Where intervention participants spoke about the improvement they felt in the months following their surgery,  
46 control arm participants also spoke about improvement, but for them this remained an ongoing process even more  
47 than 12 months on.  
48  
49

50  
51 *when I'm washing myself and, and if I touch myself I'm tender but I suppose that will go – QR17 (Age*  
52 *67, Control arm participant)*  
53  
54

55  
56 *I have still got a seroma on my chest which is a bit of a nuisance which is, um, sort of swelling of fluid*  
57 *isn't it. Um, it's less than it was and I think it's gradually going 'cause it was enormous at the very*  
58 *beginning but it's getting less – QR16 (age 79, Control arm participant)*  
59  
60



1  
2  
3 Over time, intervention participants progressed from gentle stretching to more advanced stretching and  
4 strengthening exercises as they improved. Graduating to harder exercises gave them a sense of achievement.  
5  
6

7 *When we would do the exercises and when we would move the kind of categories in the folder that was*  
8 *given, that made me feel good and made me want to kind of continue.* – QR13 (Age 28, Intervention arm  
9 participant)  
10  
11  
12

13  
14 Progression was fulfilling and rewarding, particularly in the context of cancer treatment where a sense that they  
15 were improving or getting better was lacking. To be able to measurably perceive progress in strength and  
16 movement helped to restore a sense of bodily autonomy for the women who felt disempowered by cancer  
17 treatment. During this profoundly difficult time of undergoing cancer treatment, feeling improvement and  
18 graduating to harder exercises helped them to feel that they *were* getting better, at least in some way.  
19  
20  
21  
22

## 23 24 25 Helping myself

26  
27  
28 During breast cancer treatment, women passively receive treatment [7-9, 35]. One participant described it as being  
29 “a professional waiter, you just sit and wait, and you just let everyone do what they're doing” - QR23 (Age 62,  
30 Control arm participant).  
31  
32

33  
34 In collaboration with their physiotherapist, participants receiving the exercise intervention could choose which  
35 exercises they performed from a menu, selecting exercises they felt most confident and comfortable doing. The  
36 physiotherapists felt that joint-decision making was a patient-centred approach which added to patients' sense of  
37 ownership and control of their exercises. Physiotherapists and participants both noted that this gave patients an  
38 opportunity to be pro-active, taking control of one aspect of their recovery. This sense of responsibility and  
39 ownership motivated them to exercise.  
40  
41  
42  
43  
44

45  
46 *I think it was more than the exercise. I think it was because you were doing something, because so much*  
47 *of um cancer care is being done to you...It was just quite nice to have something proactive for you to do*  
48 *rather than just turn up and have the drugs.* – QR12 (Age 55, Intervention arm participant)  
49  
50  
51

52  
53 *That was the biggest thing was that they felt that they were doing something for themselves to try and*  
54 *help their arm with the cancer that we weren't always doing things to them, they had the confidence to*  
55 *do it for themselves.* – PT02 (Physiotherapist)  
56  
57  
58  
59  
60

1  
2  
3 *I think when we were sort of promoting why we think the exercises were useful I talked about self-*  
4 *determination this is something that you can do for yourself and your care...particularly the way it was*  
5 *designed that enabled the patients to say well we could do this exercise or we could do that one. – PT10*  
6  
7  
8  
9 (Physiotherapist)

10  
11  
12  
13  
14 This was a key difference to the control arm interviewees. Most control arm participants spoke about accepting  
15 postoperative problems or just waiting for them to improve over time, apart from a few highly motivated  
16 individuals who described inventing their own exercises.  
17

18  
19  
20 *It still gets stiff now but you just have to deal with it. – QR19 (Age 68, Control arm participant)*

21  
22  
23 *Lifting up now and I can feel the stretching down that left-hand side, but, um, you know I don't know, I*  
24 *suppose it's had trauma. – QR15 (Age 44, Control arm participant)*

25  
26  
27 *The tightness on my chest does limit movement sometimes and it's sort of more of a discomfort than a*  
28 *pain and just a blessed nuisance really but everyone I've seen says it's normal that they take a while and*  
29 *it's nothing they can do so it will just go when it's ready I suppose and I kind of live with it – QR17 (Age*  
30 *67, Control arm participant)*

31  
32  
33  
34  
35  
36 Wanting to be a 'good' patient and doing as one was told motivated control group participants to follow the  
37 exercises on the Breast Cancer Care leaflet.

38  
39  
40 *Well I'd like to think I was a good patient, I started my exercises the day after I came out of hospital. –*  
41 *QR26 (Age 56, Control arm participant)*

42  
43  
44  
45 *Just the fact that the hospital gave them you and, you know, they know what they're talking about. You*  
46 *do it because you've been told to. – QR23 (Age 62, Control arm participant)*

47  
48  
49 This is in contrast to the sense of self-determination, control, and progress described by participants receiving the  
50 intervention.  
51

## 52 53 54 Looking ahead

55  
56  
57 Some participants continued to draw on knowledge gained from the intervention to alleviate ongoing problems  
58 with tightness and stiffness, and appeared to feel quite confident in managing this in the future.  
59  
60

1  
2  
3 *It's a nice thing to fall back on when I haven't and I think 'Oh this feels a bit tight' then it's like 'Right'*  
4 *get your act into gear and then do it and it does straight away it loosens it. – QR12 (Age 55, Intervention*  
5 *arm participant)*  
6  
7  
8  
9

10  
11  
12 *Now I'm just doing the massage for lymphoedema and exercises only if I feel the problem...For example*  
13 *if, if I feel the problem to reach the shelf I'm taking [the] band and I might warm it up just do the exercises*  
14 *with the elastic band exactly for this movement. – QR10 (Age 50, Intervention arm participant)*  
15  
16  
17

18 *I still go to the gym and there's a really nice instructor there and he's set me a new, um, what do you*  
19 *call it, programme [for] strengthening – QR12 (Age 55, Intervention arm participant)*  
20  
21  
22

23 *In a couple of months or so, I would like to kind of start using weights so that I can strengthen my*  
24 *arms...It's kind of like building up the strength that I was building towards whilst I was doing the*  
25 *[PROSPER] exercises before. – QR13 (Age 28, Intervention arm participant)*  
26  
27  
28

29 They felt assured that continuing with such activities would help them, and that they would know what to do or  
30 where to seek help if required.  
31  
32  
33  
34  
35  
36  
37  
38

## 39 Being the 'perfect' therapist

40  
41

42 This theme describes the physiotherapists' perspectives on the trial intervention compared to their usual practice  
43 and how it enabled them to deliver an optimal service.  
44  
45

46 *It almost like it made you be the perfect physio and the perfect way you should treat patients but you*  
47 *don't always have time to do that. – PT03 (Physiotherapist)*  
48  
49

50  
51 *Agreed goals [and] agreed exercises actually that should be what we're doing anyway that shouldn't be*  
52 *anything radically different but sometimes because of time pressures you don't...If you work more*  
53 *collaboratively with patients there are massive benefits to it and I think it just reinforced that for me. –*  
54  
55  
56  
57 PT10 (Physiotherapist)  
58  
59  
60

1  
2  
3 This was supported by patient responses, where they described the relationship they built with their  
4 physiotherapist.  
5

6  
7 *For me, you know, having the same... the same desired outcome as the physiotherapist and [wife] you*  
8 *know, kind of, being all, all, all wanting the same thing. And it kind of felt if I did those things then I*  
9 *would eventually achieve it. – QR08 (Age 43, Intervention arm participant)*  
10  
11

12  
13 *she's brilliant, she's so lovely and fantastic hugger that's what I found if somebody you meet is happy to*  
14 *give you a hug when you are in this kind of situation it... it just makes everything so much easier... you*  
15 *[physiotherapists] not only do you do your jobs but when you're dealing with people like me you are*  
16 *counsellors as well – QR12 (Age 55, Intervention arm participant)*  
17  
18

19  
20 *she asked me how I felt and it was very much about me and my progress I had told her about how active*  
21 *my life was before my cancer and she was very supportive of... mmm... in terms of that so we want to get*  
22 *you back to we don't want anything, you know, we want you to get back to that... the goal... the ultimate*  
23 *goal so obviously without pushing yourself too hard we do want you to kind of challenge yourself in*  
24 *terms of trying to get that... to that end goal of you being able to do exercise – QR13 (Age 28,*  
25 *Intervention arm participant)*  
26  
27  
28  
29  
30  
31  
32  
33

34 Physiotherapists felt that having longer appointment times and an emphasis on shared goals and shared decisions,  
35 both of which encouraged exercise adherence, represented an ideal way of working. Many of the therapists  
36 remarked that they were pleased to be able to offer this service to breast cancer patients because of their previous  
37 experience of treating women struggling with chronic immobility, pain, and psychological issues in the longer  
38 term as a result of shoulder problems following breast cancer surgery.  
39  
40  
41  
42  
43

44  
45 *When you pick up those patients [later] they come with a lot of emotional baggage and sort of their belief*  
46 *systems and it may have been years since they used their shoulder normally and then you know again if*  
47 *you've got body dysmorphic issues and they've been carrying that around for two years that's a lot more*  
48 *challenging to support. – PT06 (Physiotherapist)*  
49  
50  
51

52  
53 *We get people coming in about two years later and they've never touched their scar, they never saw a*  
54 *physio, they're stiff, their scar's horrible, they've got awful myofascial trigger points and*  
55 *tightness... They still think two years down the line they're going to hurt themselves if they over stretch*  
56 *so if you get them in at the early stage then it's just better... I had a lady who had a mastectomy it was*  
57  
58  
59  
60

1  
2  
3 *three years later she never went back to work, she never went back to any exercise, she never touched*  
4 *her scar, her mental wellbeing was like absolutely awful when I first started seeing her because she just*  
5 *didn't even know that she could have her life back. – PT01 (Physiotherapist)*  
6  
7

8  
9 *I think we work too much reactive in the NHS don't we and I think a direction to move in is work in*  
10 *prevention rather than cure. – PT02 (Physiotherapist)*  
11  
12

13  
14 Physiotherapists connected this to the broader organisation of the NHS, and the need allocate resources to  
15 preventive care.  
16  
17

## 21 22 23 Delivering physiotherapy to breast cancer patients

24  
25  
26 This theme reports views on delivering a new physiotherapist-led intervention for breast cancer patients.  
27  
28

### 29 Meeting the needs of breast cancer patients

30  
31  
32 Participants and physiotherapists suggested that adjuvant treatment, such as chemotherapy, interfered with the  
33 patients' ability to maintain the exercise programme. After stopping the exercises when they felt unwell, it was  
34 physically more difficult to start doing the exercises again. Physiotherapists reflected that intervening at this point  
35 may have helped encourage and motivate patients to continue.  
36  
37  
38

39  
40  
41 *On day 17 after chemotherapy it has been a struggle...the last three weeks with the first lot of chemo*  
42 *this...[doing the exercises has] been a lot harder than I ever anticipated. – QR11 (Age 49, Intervention*  
43 *arm participant)*  
44  
45

46  
47 *Maybe three or four times I was not well and I stopped doing the exercises for three or four days if I was*  
48 *ill and after that it was more difficult to do the exercises after. – QR10 (Age 50, Intervention arm*  
49 *participant)*  
50  
51

52  
53  
54 *A patient would come in for their first appointment and probably just post-surgery and most of them*  
55 *were quite positive had quite a lot of goals... they'd start their chemotherapy and then it was a whole*  
56 *different ball game because it was just kind of managing their fatigue and we struggled to get people*  
57 *back in for appointments. – PT02 (Physiotherapist)*  
58  
59  
60

1  
2  
3 The physiotherapists noted that patients needed emotional support, and that it was difficult to provide this in a  
4  
5 curtained cubicle in an open-plan space, where patients potentially felt more vulnerable.  
6

7  
8 *I think one of the things if I was to launch a service based on this intervention I would try and get a*  
9  
10 *private treatment room 'cause we're working in curtained cubicles a lot of the time and I felt that didn't*  
11  
12 *set the tone, I think if you're asking someone to take their bra off then and you can feel y'know curtains*  
13  
14 *move with the best will in the world, not move open necessarily but you have that sense of 'Oh it's just a*  
15  
16 *piece of material between me and God knows who'. – PT10 (Physiotherapist)*  
17

18  
19 Two therapists felt that physiotherapists should be female as they would better understand the meaning of losing  
20  
21 a breast and more able to engage in the emotional and physical work of treating these patients.  
22

23  
24 *They would probably connect better with a female and I was surprised how much women wanted to talk*  
25  
26 *to me about their connection with their breasts so for a lot of them they felt like that was their femininity*  
27  
28 *or that was um a connection to their womanhood and so I think most guys couldn't relate to how that*  
29  
30 *feels so I could get where they were coming from. – PT08 (Physiotherapist)*  
31

32 This issue was not mentioned by the trial participants we interviewed.  
33

### 34 35 Emotional support for physiotherapists 36

37  
38 Physiotherapists typically provide emotional support to patients, however, some therapists highlighted particular  
39  
40 challenges in relation to this patient group due to the context of cancer treatment, for example, patients were  
41  
42 fearful of dying from breast cancer. This was in contrast to their usual caseload which often involved caring for  
43  
44 musculoskeletal patients with chronic conditions.  
45

46  
47 *I am a person who cries quite easily so I was like 'Ok I need to keep things under control myself*  
48  
49 *because I am the professional' ... If I was to do it longer term I would need some better kind of*  
50  
51 *guidance and help to deal with that...sometimes I felt a little bit lost. – PT08 (Physiotherapist)*  
52

53  
54 *We were lucky because we had each other but there were times where it was upsetting to hear...If we*  
55  
56 *were permanent members of staff in oncology you would be given some...de-briefing or kind of*  
57  
58 *decompression but we were never offered that... both of us have had very close relatives die because of*  
59  
60 *cancer...nobody considered that at all. – PT06 (Physiotherapist)*

1  
2  
3 The physiotherapists felt they would need emotional support if they worked routinely with breast cancer patients.  
4  
5

## 6 Physiotherapists' time, skills, and organisational integration 7

8  
9 Delivering the intervention was time-consuming for physiotherapists.  
10

11 *I would say giving them the choice of exercise is time consuming which you wouldn't have in real life,*  
12 *you wouldn't have the time. – PT09 (Physiotherapist)*  
13  
14

15  
16 Trial appointments were longer than usual and there were doubts about how this could be practically implemented  
17 as part of routine NHS clinical care given current time restrictions on appointments. The physiotherapists felt  
18 confident in identifying and treating physical shoulder problems, but often expressed a need for training about  
19 breast cancer, its treatments, and cancer specific complications. Cording, lymphedema, and seroma were  
20 unfamiliar postoperative complications to some physiotherapists until they took part in the trial.  
21  
22

23  
24  
25  
26 *We are MSK [musculoskeletal] physios and we know what a tight shoulder is and we know how to get*  
27 *it moving, so actually the assessment and the exercises wasn't so much of a worry, but patients*  
28 *occasionally asked me a question that maybe I couldn't answer...the background behind the cancer, a*  
29 *bit more about the actual surgical techniques they did and why and a little bit more about the*  
30 *reasoning of why lymphedema and cording does actually develop and what it means, I might have*  
31 *benefitted from more training from that aspect. – PT03 (Physiotherapist)*  
32  
33

34  
35  
36 *Being able to advise people a bit more around like scar massage or kind of...any of the manual*  
37 *treatments that we could've done and when is right and wrong to use them [was difficult]. – PT02*  
38  
39  
40  
41  
42 (Physiotherapist)  
43  
44

45 Physiotherapists felt disconnected from the surgical or oncology team treating the patient which was challenging.  
46

47  
48 *There's not necessarily the integration with like the nurses or the lymphedema team, we are quite a*  
49 *separate team from them so I think it does need to be a multi-disciplinary approach and because we're*  
50 *not involved with them it makes it a little bit difficult [to know] whether we should or shouldn't be*  
51 *doing those interventions. – PT03 (Physiotherapist)*  
52  
53

54  
55  
56 *I sometimes found it difficult to ask about things like chemo, radiotherapy and repeat surgeries*  
57 *because I almost felt like it was something that I should know... I find that, I feel a bit uncomfortable*  
58 *about that, that I think they come in, and expect, and that's what I'd want as a healthcare professional*  
59  
60

1  
2  
3 *I want them to know what's going on I shouldn't have to tell you when I am having my chemo or this is*  
4 *happening.* – PT05 (Physiotherapist)  
5  
6

7 Better integration with the oncology team would have given them greater understanding of the specific patient's  
8 treatment schedule as they sometimes felt uncertain about whether the interventions were appropriate at a  
9 particular stage of cancer treatment.  
10  
11  
12  
13  
14  
15  
16  
17

## 18 Discussion

19  
20  
21  
22 This qualitative study embedded within a large multicentre clinical trial makes a unique contribution to the  
23 literature. Our study illustrates that an individual supported exercise intervention is perceived as acceptable and  
24 beneficial by both patients and physiotherapists. Comparing the intervention and control arm enabled us to  
25 demonstrate that the intervention helped participants feel empowered and regaining a sense of control, whereas  
26 participants in the control arm spoke of passively accepting the upper limb limitations they experienced. Previous  
27 studies have explored perceptions of exercise in the context of an exercise intervention [36-38], but this is the first  
28 to include the perspectives of both intervention and control group participants, as well as physiotherapists  
29 delivering the intervention. We gained multiple perspectives on the same issue, and included all stakeholders in  
30 the study. This allowed us to triangulate and identify themes which were present across all groups. By using  
31 qualitative methods, we elicited the particular elements of the intervention which helped motivate participants,  
32 and those which were easier or more difficult to deliver in the clinical setting. This intervention is the first early  
33 structured physiotherapy-led home-based exercise intervention to be tested in breast cancer patients in the UK.  
34 An understanding of the acceptability of the intervention to patients and physiotherapists will inform future  
35 implementation strategies if the intervention is clinically and cost-effective.  
36  
37  
38  
39  
40  
41  
42  
43  
44  
45  
46  
47  
48  
49

50 Uncertainty has been identified as a feature of the experience of cancer [39, 29]. The subtheme of 'making  
51 progress' showed how witnessing improvement for themselves in terms of strength and stretching stood out in  
52 sharp contrast with the uncertainty surrounding cancer and its treatment. Participants also gained a sense of control  
53 over their progress, through being involved in choosing exercises, and through taking responsibility for  
54 completing their exercises each day (subthemes of 'helping myself' and looking ahead'). This combination  
55 appeared to restore patients' sense of autonomy over their bodies, and improved their wellbeing as they felt less  
56  
57  
58  
59  
60



1  
2  
3       disempowered and hopeless. This echoes previous research which found feelings of increased empowerment when  
4       breast cancer patients participated in physical activity during active treatment [40-42]. These experiences  
5       contrasted to those in the control group, who did not experience the same sense of empowerment and progress.  
6  
7       Specific aspects of the intervention which contributed to this sense of control over and above usual care were the  
8  
9       contact with physiotherapists and the reassurance this provided, the sense of progress working through the  
10       prescribed programme as exercises increased in difficulty, and the shared decision-making used to select the home  
11       exercises. Previous research has found that participating in a group activity can be a way of forgetting about the  
12       illness [36]. Our study illustrates this can also be true for home-based or individually supported exercise  
13       programmes.  
14  
15

16  
17  
18  
19  
20  
21       Being diagnosed with a serious illness such as cancer can cause an individual to lose trust and confidence in their  
22       bodily knowledge and of what their bodies are capable of doing [12, 43-45]. The women in this study reported  
23       kinesiophobia (fear of movement) in the acute period following surgery, but those in the intervention arm felt the  
24       intervention helped them overcome this (subtheme of 'reassurance'). Kinesiophobia has been shown to be  
25       associated with lymphoedema and greater pain intensity [33, 34]. Physiotherapists were able to reassure patients  
26       that their bodily sensations were normal, and gave them confidence to push themselves physically which  
27       motivated them to adhere to the programme. The interview data suggested that the role of the physiotherapist in  
28       affirming this progress and confidence was crucial. Physiotherapists provided invaluable emotional support, as  
29       patients unburdened onto them and shared their fears about the future and their bodies.  
30  
31  
32  
33  
34  
35  
36  
37  
38

39       The physiotherapists enjoyed seeing positive improvements in the participants, and felt passionate about  
40       delivering what they viewed as high quality care to this patient group (subtheme of 'being the perfect therapist').  
41       Physiotherapists felt satisfaction in being able to take preventive action against problems arising in the future for  
42       these women. Patients also appreciated the supportive nature of the intervention, sharing decisions and working  
43       together towards the same goal. Other authors have called for a more proactive model of health care provision for  
44       this patient group, and identified the need to improve physiotherapists' confidence in supporting these patients  
45       [46]. Our physiotherapists felt that they needed better integration with the rest of the patient's healthcare providers  
46       (final subtheme of 'Physiotherapists' time, skills, and organisational integration'). Other studies have also  
47       emphasised the importance of aligning expectations and knowledge about exercise based rehabilitation across the  
48       whole cancer care team [5] Challenges to the exercise programme were the side effects of treatment, in particular  
49       fatigue, which has been highlighted in other research as a barrier to exercise for breast cancer patients [36]. If a  
50       physiotherapist can provide motivation and encouragement during chemotherapy, this may improve adherence to  
51  
52  
53  
54  
55  
56  
57  
58  
59  
60

1  
2  
3 exercise. However, it is also important to ensure that physiotherapists are sympathetic to treatment-related issues,  
4 and can tailor programmes during these periods of fatigue [36].  
5  
6

7  
8 The theme 'Delivering physiotherapy to breast cancer patients' highlighted considerations for the implementation  
9 of an exercise intervention for breast cancer patients. The intervention should be delivered in a private walled  
10 room, ideally with a specifically-trained (female) physiotherapist who is part of the multi-disciplinary oncology  
11 team caring for the patient. The most important ingredient of the intervention was contact with the  
12 physiotherapists, suggesting resources should be focused on training and supporting physiotherapists to provide  
13 this care. Some physiotherapists reported feeling upset when treating patients because of the patients' distress or  
14 their own experiences of cancer. This suggests that healthcare professionals caring for oncology patients should  
15 be given the opportunity of debriefing and emotional support. This is an important consideration when designing  
16 future interventions for this patient group.  
17  
18  
19  
20  
21  
22  
23  
24

25  
26 In the PROSPER trial, participants underwent a one hour assessment and then subsequent 30-minute follow-up  
27 appointments. Routine UK physiotherapy outpatient appointments are often 40 minutes (assessment) and 20  
28 minutes (follow-up). Physiotherapists worked with patients to select the exercises. This may be challenging to  
29 deliver in a resource-stretched NHS context. However, longer appointments with physiotherapists, creating shared  
30 goals, and making shared decisions about exercises, were viewed as the most important ingredients in the  
31 successful delivery of the intervention. This was brought out in all our themes. Other studies have highlighted  
32 how autonomy of choice over exercises may increase motivation and adherence [37, 47]. Additionally, we  
33 provided the PROSPER materials in an attractive ring binder with colour photographs, laminated sheets, and  
34 provided exercise diary handouts. Patient-participants said the diary was useful as a prompt to remember to do  
35 their exercises, and it was helpful to see photographs of the exercises.  
36  
37  
38  
39  
40  
41  
42  
43  
44

45  
46 Acting more proactively by providing good access to physiotherapy treatment early after, or alongside, breast  
47 cancer treatment could help to reduce the number of patients with cancer presenting with musculoskeletal  
48 complications [48]. Although our physiotherapist-participants felt very comfortable with aspects of the  
49 intervention such as improving shoulder mobility, they expressed a need for greater training, support, and  
50 guidance in relation to specific issues such as cording and lymphoedema. The physiotherapists delivering the  
51 PROSPER intervention were musculoskeletal specialists with limited experience in treating patients in the acute  
52 postoperative period. Physiotherapists in the UK receive little training in rehabilitation following cancer treatment,  
53 reflected by the limited centres across the UK with physiotherapists specialised in oncology [48]. Given the  
54  
55  
56  
57  
58  
59  
60

1  
2  
3 increasing number of people surviving cancer and living with the consequences of cancer treatment, there is an  
4 urgent need in the UK to upskill physiotherapists in cancer-related rehabilitation to allow patients better access to  
5 this type of rehabilitation.  
6  
7  
8  
9

## 10 Conclusion

11  
12  
13  
14 This study has highlighted how a physiotherapist-led home exercise programme, with built-in progression and  
15 shared decision-making, helped women undergoing breast cancer treatment gain a restored sense of control over  
16 their wellbeing, and empowered them during a highly disempowering experience.  
17  
18  
19

## 20 Author statement

21  
22  
23  
24  
25  
26 JB is Chief Investigator of the PROSPER Trial. JB/SR/EW/HR/BM contributed to the study protocol. SR collected  
27 and analysed the data. JB/BM/HR/JB/EW assisted with analysis and interpretation. SR led the writing of the  
28 paper, and all other authors contributed to writing and editing.  
29  
30  
31

## 32 Funding

33  
34  
35  
36  
37 Funding for the PROSPER trial was provided by the Health Technology Assessment programme of the National  
38 Institute for Health Research (NIHR) (Project Number 13/84/10). JB is supported by NIHR Research Capability  
39 Funding via University Hospitals Coventry and Warwickshire. EW is supported by the NIHR Applied Research  
40 Collaboration Oxford and Thames Valley.  
41  
42  
43  
44  
45

## 46 Conflicts of interest

47  
48  
49  
50  
51 The authors have no conflicts of interest.  
52  
53  
54  
55  
56  
57  
58  
59  
60

## Data availability statement

The datasets generated during and/or analysed during the current study are not publicly available due to the need to protect the identity of participants.

## Patient and Public Involvement

Patients partnered with us for the design of the study, the informational material to support the qualitative research, and the burden of the interview from the patient's perspective.

## Acknowledgements

We would like to thank all the physiotherapists and trial participants who took part in this interview study. We dedicate this paper to Elizabeth (Lizzie) Abbey (nee Fort) who passed away on 3rd April 2018. Lizzie helped set up the trial and was a highly valued member of the PROSPER team.

## References

1. McNeely ML, Campbell K, Ospina M, Rowe BH, Dabbs K, Klassen TP et al. Exercise interventions for upper-limb dysfunction due to breast cancer treatment. *Cochrane Database Syst Rev*. 2010(6). doi:10.1002/14651858.CD005211.pub2.
2. Mejdahl MK, Andersen KG, Gärtner R, Kroman N, Kehlet H. Persistent pain and sensory disturbances after treatment for breast cancer: six year nationwide follow-up study. *BMJ*. 2013;346:f1865.
3. Cardoso F, Kyriakides S, Ohno S, Penault-Llorca F, Poortmans P, Rubio IT et al. Early breast cancer: ESMO Clinical Practice Guidelines for diagnosis, treatment and follow-up. *Ann Oncol*. 2019. doi:10.1093/annonc/mdz173.
4. Excellence NIHC. Early and locally advanced breast cancer: diagnosis and management NICE guideline [NG101]. 2018. <https://www.nice.org.uk/guidance/ng101/chapter/Recommendations>. Accessed 31st January 2020.
5. Dennett AM, Harding KE, Reed MS. The challenge of timing: a qualitative study on clinician and patient perspectives about implementing exercise-based rehabilitation in an acute cancer treatment setting. *Support Care Cancer*. 2020. doi:10.1007/s00520-020-05436-7.
6. Fisher MI, Howell D. The power of empowerment: An ICF-based model to improve self-efficacy and upper extremity function of survivors of breast cancer. *Rehabil Oncol*. 2010;28(3).
7. Dunn J, Steginga SK. Young women's experience of breast cancer: defining young and identifying concerns. *Psychooncology*. 2000;9(2):137-46.

8. Thomas-MacLean R. Memories of treatment: the immediacy of breast cancer. *Qual Health Res.* 2004;14(5):628-43. doi:10.1177/1049732304263658.
9. Little M, Jordens CF, Paul K, Montgomery K, Philipson B. Liminality: a major category of the experience of cancer illness. *Soc Sci Med.* 1998;47(10):1485-94.
10. McCann L, Illingworth N, Wengström Y, Hubbard G, Kearney N. Transitional experiences of women with breast cancer within the first year following diagnosis. *J Clin Nurs.* 2010;19(13-14):1969-76.
11. Trusson D, Pilnick A, Roy S. A new normal?: Women's experiences of biographical disruption and liminality following treatment for early stage breast cancer. *Soc Sci Med.* 2016.
12. Rees S. No one scans you and says 'you're alright now': the experience of embodied risk for young women living with a history of breast cancer. *Health, Risk & Society.* 2018:1-13. doi:10.1080/13698575.2018.1539468.
13. Kim S, Han J, Lee MY, Jang MK. The experience of cancer-related fatigue, exercise and exercise adherence among women breast cancer survivors: Insights from focus group interviews. *J Clin Nurs.* 2020;29(5-6):758-69. doi:10.1111/jocn.15114.
14. Livsey L, Lewis K. Breast cancer survivors' perceptions of participating in a supervised exercise intervention: An exploratory review of the literature. *Women Health.* 2018;58(9):1017-36. doi:10.1080/03630242.2017.1372844.
15. Kenyon K Mres PT, Hebron C PhD PT, Vuoskoski P PhD PT, McCrum C Dprof PT. Physiotherapists' experiences of managing upper limb movement impairments due to breast cancer treatment. *Physiother Theory Pract.* 2018:1-14. doi:10.1080/09593985.2018.1480077.
16. Bruce J, Williamson E, Lait C, Richmond H, Betteley L, Lall R et al. Randomised controlled trial of exercise to prevent shoulder problems in women undergoing breast cancer treatment: study protocol for the prevention of shoulder problems trial (UK PROSPER). *BMJ Open.* 2018;8(3):e019078. doi:10.1136/bmjopen-2017-019078.
17. Richmond H, Lait C, Srikesavan C, Williamson E, Moser J, Newman M et al. Development of an exercise intervention for the prevention of musculoskeletal shoulder problems after breast cancer treatment: the prevention of shoulder problems trial (UK PROSPER). *BMC Health Serv Res.* 2018;18(1):463. doi:10.1186/s12913-018-3280-x.
18. Archer MS. *Realist social theory: The morphogenetic approach.* Cambridge University Press; 1995.
19. Bhaskar R. *A realist theory of science.* Routledge; 2013.
20. Braun V, Clarke V. Reflecting on reflexive thematic analysis. *Qualitative Research in Sport, Exercise and Health.* 2019;11(4):589-97. doi:10.1080/2159676X.2019.1628806.
21. O'Brien BC, Harris IB, Beckman TJ, Reed DA, Cook DAJAM. Standards for reporting qualitative research: a synthesis of recommendations. 2014;89(9):1245-51.
22. Ltd QIP. NVivo qualitative data analysis software. QSR International Pty Ltd. Stockholm, Sweden; 2008.
23. Guest G, MacQueen KM, Namey EE. *Applied thematic analysis.* Sage; 2011.
24. Boyatzis RE. *Transforming qualitative information: Thematic analysis and code development.* sage; 1998.
25. Charmaz K. *Constructing grounded theory.* Sage; 2014.
26. Braun V, Clarke V. To saturate or not to saturate? Questioning data saturation as a useful concept for thematic analysis and sample-size rationales. *Qualitative Research in Sport, Exercise and Health.* 2019:1-16. doi:10.1080/2159676X.2019.1704846.
27. Hennink MM, Kaiser BN, Marconi VC. Code saturation versus meaning saturation: how many interviews are enough? *Qual Health Res.* 2017;27(4):591-608.
28. Rees S. A qualitative exploration of the meaning of the term "survivor" to young women living with a history of breast cancer. *European journal of cancer care.* 2018;27(3):e12847.
29. Rees S. 'Am I really gonna go sixty years without getting cancer again?' Uncertainty and liminality in young women's accounts of living with a history of breast cancer. *Health.* 2017;21(3):241-58. doi:10.1177/1363459316677628.
30. Rees S, Young A. The experiences and perceptions of women diagnosed with breast cancer during pregnancy. *Asia-Pacific journal of oncology nursing.* 2016;3(3):252-8. doi:10.4103/2347-5625.189814.
31. Hutchinson A, Rees S, Young A, Maraveyas A, Date K, Johnson MJ. Oral anticoagulation is preferable to injected, but only if it is safe and effective: An interview study of patient and carer experience of oral and injected anticoagulant therapy for cancer-associated thrombosis in the select-d trial. *Palliat Med.* 2019;33(5):510-7.
32. Lincoln YS, Guba EG. But is it rigorous? Trustworthiness and authenticity in naturalistic evaluation. *New directions for program evaluation.* 1986;1986(30):73-84.
33. Gencay Can A, Can SS, Ekşioğlu E, Çakıcı FA. Is kinesiophobia associated with lymphedema, upper extremity function, and psychological morbidity in breast cancer survivors? *Turkish journal of physical medicine and rehabilitation.* 2018;65(2):139-46. doi:10.5606/tftrd.2019.2585.

- 1  
2  
3 34. Martinez-Calderon J, Struyf F, Meeus M, Luque-Suarez A. The association between pain beliefs and pain  
4 intensity and/or disability in people with shoulder pain: A systematic review. *Musculoskelet Sci Pract.*  
5 2018;37:29-57. doi:10.1016/j.msksp.2018.06.010.
- 6 35. Trusson D. *Living with a new normal: women's experiences following treatment for early-stage breast*  
7 *cancer or DCIS*: University of Nottingham; 2013.
- 8 36. Browall M, Mijwel S, Rundqvist H, Wengstrom Y. Physical Activity During and After Adjuvant Treatment  
9 for Breast Cancer: An Integrative Review of Women's Experiences. *Integr Cancer Ther.* 2018;17(1):16-30.  
10 doi:10.1177/1534735416683807.
- 11 37. Ingram C, Wessel J, Courneya KS. Women's perceptions of home-based exercise performed during adjuvant  
12 chemotherapy for breast cancer. *Eur J Oncol Nurs.* 2010;14(3):238-43. doi:10.1016/j.ejon.2010.01.027.
- 13 38. Luoma ML, Hakamies-Blomqvist L, Blomqvist C, Nikander R, Gustavsson-Lilius M, Saarto T. Experiences  
14 of breast cancer survivors participating in a tailored exercise intervention -a qualitative study. *Anticancer Res.*  
15 2014;34(3):1193-9.
- 16 39. Halliday LE, Boughton MA, Kerridge I. Mothering and self-othering: The impact of uncertain reproductive  
17 capability in young women after hematological malignancy. *Health Care Women Int.* 2014;35(3):249-65.
- 18 40. Husebo AM, Karlsen B, Allan H, Soreide JA, Bru E. Factors perceived to influence exercise adherence in  
19 women with breast cancer participating in an exercise programme during adjuvant chemotherapy: a focus group  
20 study. *J Clin Nurs.* 2015;24(3-4):500-10. doi:10.1111/jocn.12633.
- 21 41. Crane-Okada R, Kiger H, Anderson NL, Carroll-Johnson RM, Sugerman F, Shapiro SL et al. Participant  
22 perceptions of a mindful movement program for older women with breast cancer: focus group results. *Cancer*  
23 *Nurs.* 2012;35(3):E1-10. doi:10.1097/NCC.0b013e31822539c5.
- 24 42. Bulmer SM, Howell J, Ackerman L, Fedric R. Women's perceived benefits of exercise during and after  
25 breast cancer treatment. *Women Health.* 2012;52(8):771-87. doi:10.1080/03630242.2012.725707.
- 26 43. Williams SJ. The vicissitudes of embodiment across the chronic illness trajectory. *Body & Society.*  
27 1996;2(2):23-47.
- 28 44. Lindwall L, Bergbom I. The altered body after breast cancer surgery. *International Journal of Qualitative*  
29 *Studies on Health and Well-being.* 2009;4(4):280-7.
- 30 45. Crouch M, McKenzie H. Social realities of loss and suffering following mastectomy. *Health.*  
31 2000;4(2):196-215.
- 32 46. Levangie PK, Santasier AM, Stout NL, Pfalzer L. A qualitative assessment of upper quarter dysfunction  
33 reported by physical therapists treated for breast cancer or treating breast cancer sequelae. *Support Care Cancer.*  
34 2011;19(9):1367-78. doi:10.1007/s00520-010-0959-x.
- 35 47. Jones LW, Courneya KS, Fairey AS, Mackey JR. Does the theory of planned behavior mediate the effects of  
36 an oncologist's recommendation to exercise in newly diagnosed breast cancer survivors? Results from a  
37 randomized controlled trial. *Health Psychol.* 2005;24(2):189.
- 38 48. Robinson M, Ward L, Mehanna H, Paleri V, Winter SC. Provision of physiotherapy rehabilitation following  
39 neck dissection in the UK. *The Journal of Laryngology & Otology.* 2018;132(7):624-7.  
40 doi:10.1017/S0022215118000671.
- 41  
42  
43  
44  
45  
46  
47  
48  
49  
50  
51  
52  
53  
54  
55  
56  
57  
58  
59  
60

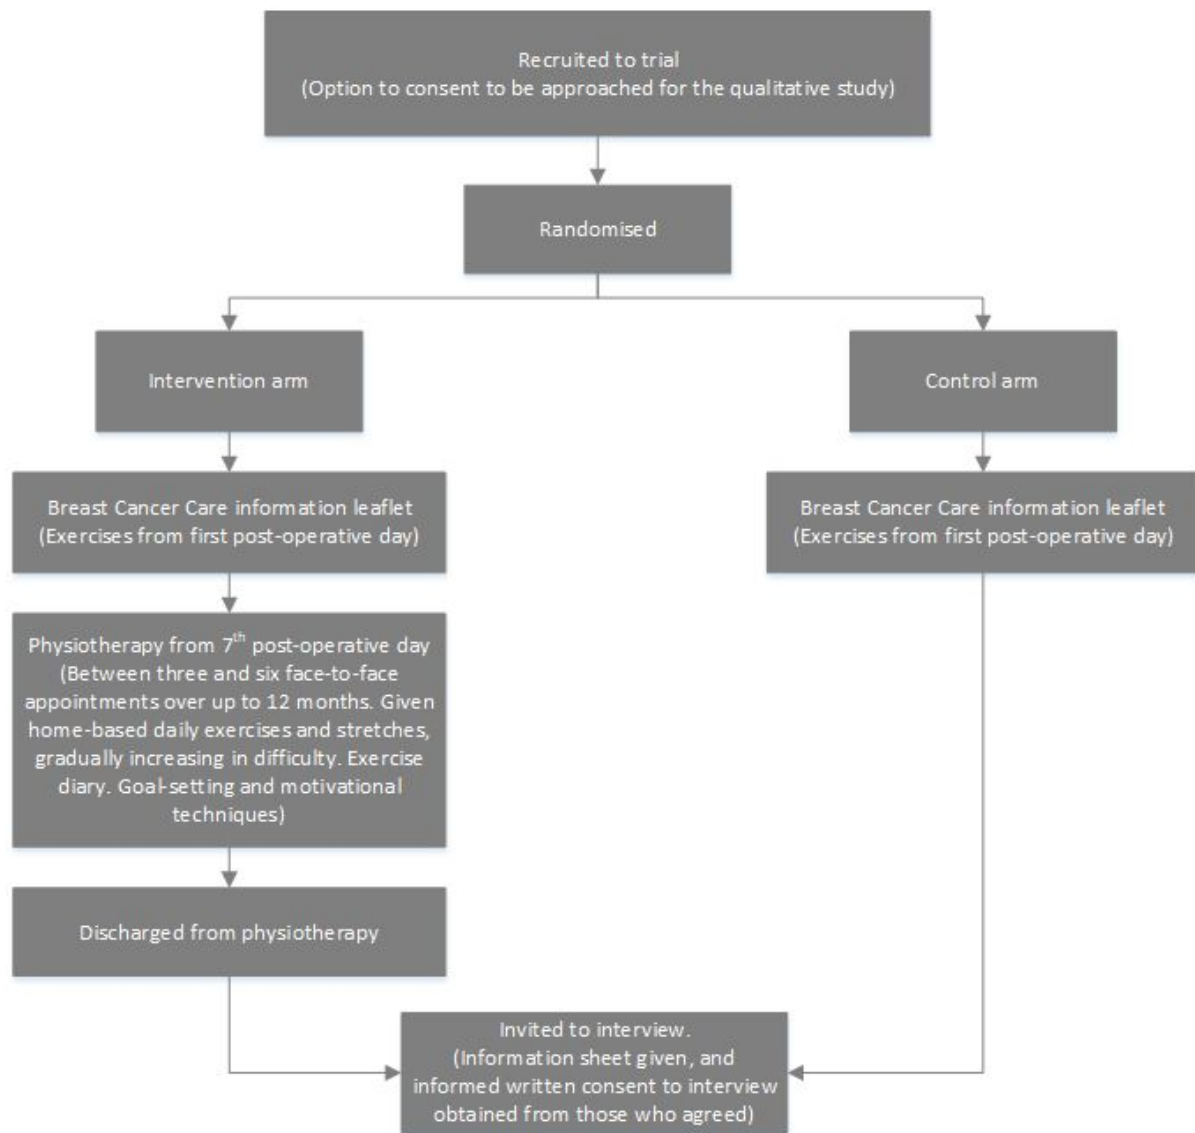

Figure 1- Participant pathway through trial and qualitative study

# Reporting checklist for qualitative study.

Based on the SRQR guidelines.

## Instructions to authors

Complete this checklist by entering the page numbers from your manuscript where readers will find each of the items listed below.

Your article may not currently address all the items on the checklist. Please modify your text to include the missing information. If you are certain that an item does not apply, please write "n/a" and provide a short explanation.

Upload your completed checklist as an extra file when you submit to a journal.

In your methods section, say that you used the SRQR reporting guidelines, and cite them as:

O'Brien BC, Harris IB, Beckman TJ, Reed DA, Cook DA. Standards for reporting qualitative research: a synthesis of recommendations. *Acad Med.* 2014;89(9):1245-1251.

|                              | Reporting Item                                                                                                                                                                                                                                          | Page Number |
|------------------------------|---------------------------------------------------------------------------------------------------------------------------------------------------------------------------------------------------------------------------------------------------------|-------------|
| <b>Title</b>                 |                                                                                                                                                                                                                                                         |             |
|                              | <a href="#">#1</a> Concise description of the nature and topic of the study identifying the study as qualitative or indicating the approach (e.g. ethnography, grounded theory) or data collection methods (e.g. interview, focus group) is recommended |             |
| <b>Abstract</b>              |                                                                                                                                                                                                                                                         |             |
|                              | <a href="#">#2</a> Summary of the key elements of the study using the abstract format of the intended publication; typically includes background, purpose, methods, results and conclusions                                                             |             |
| <b>Introduction</b>          |                                                                                                                                                                                                                                                         |             |
| Problem formulation          | <a href="#">#3</a> Description and significance of the problem / phenomenon studied: review of relevant theory and empirical work; problem statement                                                                                                    |             |
| Purpose or research question | <a href="#">#4</a> Purpose of the study and specific objectives or questions                                                                                                                                                                            |             |



## 1 **Methods**

- 2
- 3 **Qualitative approach and** [#5](#) Qualitative approach (e.g. ethnography, grounded theory, case
- 4 **research paradigm** study, phenomenology, narrative research) and guiding theory if
- 5 appropriate; identifying the research paradigm (e.g.
- 6 postpositivist, constructivist / interpretivist) is also
- 7 recommended; rationale. The rationale should briefly discuss
- 8 the justification for choosing that theory, approach, method or
- 9 technique rather than other options available; the assumptions
- 10 and limitations implicit in those choices and how those choices
- 11 influence study conclusions and transferability. As appropriate
- 12 the rationale for several items might be discussed together.
- 13
- 14
- 15
- 16
- 17
- 18
- 19 **Researcher characteristics** [#6](#) Researchers' characteristics that may influence the research,
- 20 **and reflexivity** including personal attributes, qualifications / experience,
- 21 relationship with participants, assumptions and / or
- 22 presuppositions; potential or actual interaction between
- 23 researchers' characteristics and the research questions, approach,
- 24 methods, results and / or transferability
- 25
- 26
- 27
- 28
- 29 **Context** [#7](#) Setting / site and salient contextual factors; rationale
- 30
- 31 **Sampling strategy** [#8](#) How and why research participants, documents, or events were
- 32 selected; criteria for deciding when no further sampling was
- 33 necessary (e.g. sampling saturation); rationale
- 34
- 35
- 36 **Ethical issues pertaining to** [#9](#) Documentation of approval by an appropriate ethics review
- 37 **human subjects** board and participant consent, or explanation for lack thereof;
- 38 other confidentiality and data security issues
- 39
- 40
- 41
- 42 **Data collection methods** [#10](#) Types of data collected; details of data collection procedures
- 43 including (as appropriate) start and stop dates of data collection
- 44 and analysis, iterative process, triangulation of sources /
- 45 methods, and modification of procedures in response to
- 46 evolving study findings; rationale
- 47
- 48
- 49
- 50 **Data collection instruments** [#11](#) Description of instruments (e.g. interview guides,
- 51 **and technologies** questionnaires) and devices (e.g. audio recorders) used for data
- 52 collection; if / how the instruments(s) changed over the course
- 53 of the study
- 54
- 55
- 56
- 57 **Units of study** [#12](#) Number and relevant characteristics of participants, documents,
- 58 or events included in the study; level of participation (could be
- 59

reported in results)

- 1  
2  
3 Data processing [#13](#) Methods for processing data prior to and during analysis,  
4 including transcription, data entry, data management and  
5 security, verification of data integrity, data coding, and  
6 anonymisation / deidentification of excerpts  
7  
8  
9 Data analysis [#14](#) Process by which inferences, themes, etc. were identified and  
10 developed, including the researchers involved in data analysis;  
11 usually references a specific paradigm or approach; rationale  
12  
13  
14 Techniques to enhance [#15](#) Techniques to enhance trustworthiness and credibility of data  
15 trustworthiness analysis (e.g. member checking, audit trail, triangulation);  
16 rationale  
17  
18  
19  
20 **Results/findings**  
21  
22 Syntheses and [#16](#) Main findings (e.g. interpretations, inferences, and themes);  
23 interpretation might include development of a theory or model, or integration  
24 with prior research or theory  
25  
26  
27 Links to empirical data [#17](#) Evidence (e.g. quotes, field notes, text excerpts, photographs) to  
28 substantiate analytic findings  
29  
30  
31 **Discussion**  
32  
33  
34 Intergration with prior [#18](#) Short summary of main findings; explanation of how findings  
35 work, implications, and conclusions connect to, support, elaborate on, or challenge  
36 transferability and conclusions of earlier scholarship; discussion of scope of  
37 contribution(s) to the field application / generalizability; identification of unique  
38 contributions(s) to scholarship in a discipline or field  
39  
40  
41  
42 Limitations [#19](#) Trustworthiness and limitations of findings  
43  
44  
45 **Other**  
46  
47 Conflicts of interest [#20](#) Potential sources of influence of perceived influence on study  
48 conduct and conclusions; how these were managed  
49  
50  
51 Funding [#21](#) Sources of funding and other support; role of funders in data  
52 collection, interpretation and reporting  
53

54 None The SRQR checklist is distributed with permission of Wolters Kluwer © 2014 by the Association of  
55 American Medical Colleges. This checklist can be completed online using <https://www.goodreports.org/>, a tool  
56 made by the [EQUATOR Network](#) in collaboration with [Penelope.ai](#)  
57  
58

# BMJ Open

## The role of physiotherapy in supporting recovery from breast cancer treatment: A qualitative study embedded within the UK PROSPER trial

|                                 |                                                                                                                                                                                                                                                                                                                                                                                                                                                                                                                                                                                                                                                                                                                             |
|---------------------------------|-----------------------------------------------------------------------------------------------------------------------------------------------------------------------------------------------------------------------------------------------------------------------------------------------------------------------------------------------------------------------------------------------------------------------------------------------------------------------------------------------------------------------------------------------------------------------------------------------------------------------------------------------------------------------------------------------------------------------------|
| Journal:                        | <i>BMJ Open</i>                                                                                                                                                                                                                                                                                                                                                                                                                                                                                                                                                                                                                                                                                                             |
| Manuscript ID                   | bmjopen-2020-040116.R2                                                                                                                                                                                                                                                                                                                                                                                                                                                                                                                                                                                                                                                                                                      |
| Article Type:                   | Original research                                                                                                                                                                                                                                                                                                                                                                                                                                                                                                                                                                                                                                                                                                           |
| Date Submitted by the Author:   | 18-Nov-2020                                                                                                                                                                                                                                                                                                                                                                                                                                                                                                                                                                                                                                                                                                                 |
| Complete List of Authors:       | Rees, Sophie; University of Warwick, Warwick Clinical Trials Unit<br>Mazuquin, Bruno; University of Warwick, Warwick Clinical Trials Unit;<br>Manchester Metropolitan University, Faculty of Health, Psychology and Social Care<br>Richmond, Helen ; University of Warwick, Warwick Clinical Trials Unit;<br>Memorial University of Newfoundland, Faculty of Medicine<br>Williamson, Esther; Nuffield Department of Orthopaedics, Rheumatology and Musculoskeletal Sciences, University of Oxford, United Kingdom. ,<br>Centre for Rehabilitation Research in Oxford<br>Bruce, Julie; University of Warwick, Warwick Clinical Trials Unit<br>-, UK PROSPER Study Group; University of Warwick, Warwick Clinical Trials Unit |
| <b>Primary Subject Heading</b>: | Oncology                                                                                                                                                                                                                                                                                                                                                                                                                                                                                                                                                                                                                                                                                                                    |
| Secondary Subject Heading:      | Qualitative research, Surgery                                                                                                                                                                                                                                                                                                                                                                                                                                                                                                                                                                                                                                                                                               |
| Keywords:                       | QUALITATIVE RESEARCH, Breast surgery < SURGERY, PREVENTIVE MEDICINE                                                                                                                                                                                                                                                                                                                                                                                                                                                                                                                                                                                                                                                         |
|                                 |                                                                                                                                                                                                                                                                                                                                                                                                                                                                                                                                                                                                                                                                                                                             |

SCHOLARONE™  
Manuscripts



I, the Submitting Author has the right to grant and does grant on behalf of all authors of the Work (as defined in the below author licence), an exclusive licence and/or a non-exclusive licence for contributions from authors who are: i) UK Crown employees; ii) where BMJ has agreed a CC-BY licence shall apply, and/or iii) in accordance with the terms applicable for US Federal Government officers or employees acting as part of their official duties; on a worldwide, perpetual, irrevocable, royalty-free basis to BMJ Publishing Group Ltd ("BMJ") its licensees and where the relevant Journal is co-owned by BMJ to the co-owners of the Journal, to publish the Work in this journal and any other BMJ products and to exploit all rights, as set out in our [licence](#).

The Submitting Author accepts and understands that any supply made under these terms is made by BMJ to the Submitting Author unless you are acting as an employee on behalf of your employer or a postgraduate student of an affiliated institution which is paying any applicable article publishing charge ("APC") for Open Access articles. Where the Submitting Author wishes to make the Work available on an Open Access basis (and intends to pay the relevant APC), the terms of reuse of such Open Access shall be governed by a Creative Commons licence – details of these licences and which [Creative Commons](#) licence will apply to this Work are set out in our licence referred to above.

Other than as permitted in any relevant BMJ Author's Self Archiving Policies, I confirm this Work has not been accepted for publication elsewhere, is not being considered for publication elsewhere and does not duplicate material already published. I confirm all authors consent to publication of this Work and authorise the granting of this licence.

# The role of physiotherapy in supporting recovery from breast cancer treatment: A qualitative study embedded within the UK PROSPER trial

Rees S,<sup>1</sup> Mazuquin B,<sup>1,2</sup> Richmond H,<sup>1,3</sup> Williamson E,<sup>4</sup> Bruce J.<sup>1</sup> on behalf of the UK PROSPER Study Group<sup>1</sup>

<sup>1</sup>Warwick Clinical Trials Unit, University of Warwick Medical School, Coventry, UK CV4 7AL

<sup>2</sup>Faculty of Health, Psychology and Social Care, Manchester Metropolitan University

<sup>3</sup>Faculty of Medicine, Memorial University of Newfoundland, St John's, Canada

<sup>4</sup>The Centre for Rehabilitation Research, Nuffield Department of Orthopaedics, Rheumatology and Musculoskeletal Sciences, University of Oxford

Corresponding author:

Dr Sophie Rees

[S.Rees.1@warwick.ac.uk](mailto:S.Rees.1@warwick.ac.uk)

02476 151 135

## Abstract

**Objectives:** To explore the experiences of women with breast cancer of taking part in an early physiotherapy-led exercise intervention compared with the experiences of those receiving usual care. To understand physiotherapists' experience of delivering the trial intervention. To explore acceptability of the intervention and issues related to the implementation of the PROSPER programme from participant and physiotherapist perspective.

**Design:** Qualitative semi-structured interviews with thematic analysis.

**Setting:** UK National Health Service (NHS)

**Participants:** Twenty participants at high risk of shoulder problems after breast cancer surgery, recruited to the UK Prevention of Shoulder Problems (PROSPER) Trial (ten each from the intervention arm and control arm); and eleven physiotherapists who delivered the intervention. Trial participants were sampled using convenience sampling. Physiotherapists were purposively sampled from high and low recruiting sites.

**Results:** Participants described that the PROSPER exercise intervention helped them feel confident in what their body could do, and helped them regain a sense of control in the context of cancer treatment which was largely

1  
2  
3 disempowering. Control arm participants expressed less of a sense of control over their wellbeing.  
4  
5 Physiotherapists found the exercise intervention enjoyable to deliver and felt it was valuable to their patients. The  
6  
7 extra time allocated for appointments during intervention delivery made physiotherapists feel they were providing  
8  
9 optimal care, being the 'perfect physio'. Lessons were learned about the implementation of a complex exercise  
10  
11 intervention for women with breast cancer and the issues raised will inform the development of a future  
12  
13 implementation strategy.

14  
15 **Conclusions:** A physiotherapist-delivered early supported exercise intervention with integrated behavioural  
16  
17 strategies helped women at risk of shoulder problems following breast cancer treatment to feel more confident in  
18  
19 their ability to mobilise their arm post-surgery. A physiotherapist-delivered early supported exercise intervention  
20  
21 with integrated behavioural strategies may address the sense of powerlessness that many women experience  
22  
23 during breast cancer treatment.

24  
25 **Keywords:** *breast cancer; physiotherapy; rehabilitation; prevention; shoulder; qualitative research*

#### 26 27 28 **Acknowledgements**

29  
30 This study was embedded within a multicentre UK randomised controlled trial (ISCRN35358984) and was  
31  
32 funded by the National Institute for Health Research Health Technology Assessment Programme (HTA 13/84/10).  
33  
34 The research team would like to thank the trial participants and physiotherapists who participated in the qualitative  
35  
36 study.  
37

38  
39 **Word count:** 6,259 (due to quotes being included in word count)  
40  
41  
42  
43  
44  
45  
46  
47  
48  
49  
50  
51  
52  
53  
54  
55  
56  
57  
58  
59  
60

## Article Summary

### Strengths and limitations of this study

- Interviewing multiple groups (intervention arm, control arm participants, and physiotherapists) in this study enabled us to triangulate the data and explore experiences from multiple perspectives.
- We note that the participants we interviewed were a particularly motivated group, and it is possible we did not capture some of the challenges which other, less motivated, women may have experienced.
- We obtained consent to be approached for interview prior to randomisation, independent of treatment allocation, in an attempt to minimise bias. We tried to minimise the risk of social desirability bias by asking neutral questions and explaining there were no right or wrong answers
- We used a convenience sampling approach, which is a potential weakness of this study as it may have resulted in a lack of diversity amongst participants.
- Our sample was overwhelmingly white, with only one of the participants identifying as another ethnic identity. Findings may not reflect the experiences of black, Asian and other minority ethnic groups.

## Introduction

Treatment to the chest and axilla for breast cancer can result in upper body problems, such as reduced range of movement in the shoulder, muscle weakness, pain, lymphoedema, and functional limitations [1, 2]. These problems can impact on ability to carry out activities of daily living, and may persist for many years after treatment [1, 2]. Exercise in the acute phase following breast cancer surgery may improve shoulder function in women at high risk of shoulder problems [1]. Guidelines state that people diagnosed with breast cancer should be referred to physiotherapy when indicated [3, 4], however, in the UK NHS this is not routine practice. There is a need for a proactive model of care which encourages early exercise-based rehabilitation and provides physiotherapists with resources to inform their practice [5].

Loss of a sense of control, loss of self-identity, and alienation from their bodies during and after treatment are often reported by individuals with cancer [6-12]. It has been proposed that improving women's self-efficacy through physical rehabilitation may improve their quality of life [6]. Lack of knowledge about exercise, and the

1  
2  
3 experience of cancer-related fatigue were identified by individuals with cancer as obstacles to exercise in a recent  
4 Korean study [13]. A recent systematic review of the qualitative literature identified six studies of mixed quality  
5 reporting the experiences of women living beyond breast cancer of participating in a supervised exercise  
6 intervention [14]. These studies all reported on group interventions, and the findings suggest that the group  
7 element may be beneficial. Little is known about the experiences of this patient group participating in individual  
8 supported exercise intervention. There has also been little published regarding the experiences of professionals  
9 delivering exercise interventions to this patient group. One recent study reported a lack of confidence amongst  
10 physiotherapists in treating people with cancer, but respondents felt confidence grew with practice [15]. Little is  
11 known about how physiotherapists feel about the feasibility of implementing a service for people with breast  
12 cancer. This is important so that we can address challenges and issues when designing services.

13  
14  
15  
16  
17  
18  
19  
20  
21  
22  
23 The UK Prevention Of Shoulder Problems (PROSPER) Trial evaluated the clinical and cost-effectiveness of an  
24 early supported home-based physiotherapist-led exercise intervention in women with newly diagnosed breast  
25 cancer at higher risk of developing shoulder problems after treatment [16, 17]. We have published a description  
26 of the intervention and trial protocol elsewhere [16, 17]. In this paper we report the findings of the UK PROSPER  
27 trial embedded qualitative study.  
28  
29  
30  
31

32  
33 The aims of the qualitative study were:

- 34 • To understand the acceptability of the exercise intervention to participants
- 35 • To explore how the exercise intervention or control affected their experiences of recovery after cancer  
36 treatment.
- 37 • To investigate the experiences of physiotherapists delivering the exercise intervention.
- 38 • To explore participants' and physiotherapists' perspectives on issues related to the implementation of the  
39 PROSPER programme to inform future plans for implementation. .  
40  
41  
42  
43  
44  
45  
46  
47  
48  
49

50  
51 Figure 1 illustrates the pathway of participants through the trial and embedded qualitative study.  
52  
53  
54  
55

56 *Figure 1 - Participant pathway through trial and qualitative study*  
57  
58  
59  
60



## Methods

### Methodology

The study was underpinned by critical realism, assuming that an underlying reality is experienced and given meaning by individuals [18, 19]. To meet the study aims, we conducted qualitative semi-structured interviews with reflexive thematic analysis [20]. This allowed for exploration, depth, and understanding of the experiences of trial participants, thus taking an interpretive ‘sense-making’ approach rather than hypothesis-testing or confirmatory approach. We used the SRQR reporting guidelines checklist [21].

### Sampling and recruitment

#### *Trial participant interviews*

On recruitment to the trial, we offered all trial participants the option to take part in an interview at a later date (see Figure 1). We recorded signed consent to be approached for interview and this formed our sampling frame for the qualitative study. We approached women in the intervention arm after they were discharged from physiotherapy to avoid contamination bias. The researcher (SR) telephoned participants to invite them to interview, and, if they expressed an interest, participants were sent an information sheet and interview consent form.

After conducting and analysing seven interviews with intervention participants, we decided to interview control arm participants, to compare their experiences. We used our database of those who had consented pre-randomisation to select a sample comparable to the intervention sample in terms of time since randomisation, so that women were at similar stages of postoperative treatment and could reflect back over their experiences of recovery.

#### *Physiotherapist interviews*

We informed all physiotherapists delivering the intervention about the interview study. We then sampled physiotherapists from low and high recruiting trial sites to allow exploration of different perspectives on intervention delivery. SR approached therapists via email or telephone.

## Data collection

We developed flexible topic guides with women with breast cancer, based on the aims of the study and relevant literature. One-off interviews were conducted by SR either at the participant's home, by telephone (trial participants), or in a private room at their place of work (physiotherapists). Physiotherapists who worked together were interviewed in pairs. The physiotherapists who volunteered for the interviews and were interviewed in pairs worked closely together. Interviewing them in pairs allowed physiotherapists to share and reflect on their experiences, and aided recall where they had only treated a small number of participants, for example. It is possible that interviewing them in pairs could have affected their responses, but participants were remarkably candid about the challenges they experienced, thus we were not concerned that this was happening. Only the researcher and interviewees were present. All interviews were audio-recorded. We took study materials (physiotherapy manual, participant materials) into the interview to aid recall and discussion. Informed consent was gained before the interview began. The study was approved by the National Research Ethics Service Committee West Midlands Solihull on 20<sup>th</sup> July 2015 (Ref no. 15/WM/0224),

## Data analysis

Interviews were transcribed verbatim, checked for accuracy and anonymity by SR, and then uploaded to QSR NVivo Pro 11 [22]. Thematic analysis [23, 24] was conducted by SR and managed in NVivo. Interview transcripts were 'coded', where sections of text are assigned a descriptive label, producing dozens of codes per interview. These codes were then grouped into categories, and these were then grouped further into themes. Analysis began alongside data collection. As a research team, we met regularly to discuss emerging findings and the evolving analysis [25]. Saturation in this study meant that we had enough data to understand each of the identified categories and themes, rather than that there was 'nothing new' to be found [26, 27]. We reached saturation after fifteen trial participant interviews, and five physiotherapist interviews.

## Reflexivity and rigour

Interviews were conducted sensitively by a female researcher experienced in interviewing people with cancer (SR) [12, 28-31]. The evolving analysis was discussed with the research team (SR/JB/HR/BM). SR is a social scientist with expertise in qualitative research with people with health conditions, including breast cancer, and healthcare professionals. HR and BM are researchers and physiotherapists. JB is a trialist and PROSPER Chief

Investigator, she did not influence the qualitative study findings, but provided important contextual details regarding the trial and intervention. We were careful to conduct balanced interviews, without assuming that the trial participants and physiotherapists would have positive views of the intervention. SR reminded interviewees throughout that she was not involved in the development of the intervention, and welcomed their honest views. Rigour was assessed using Lincoln and Guba's conceptualisation of trustworthiness [32]. SR collected the data and was immersed in the data during analysis. Quotes have been provided to illustrate themes.

## Results

### Sample

We recruited 392 women (196 per arm) to the PROSPER clinical trial from 17 breast cancer centres in England. Overall, 67% (n=264/392) of trial participants provided signed consent to be contacted for an interview. In total, we attempted to contact 53 women regarding an interview. Of these, 11 were not contactable, 17 agreed initially for an interview but could not be reached again, and five declined. Ten participants from the intervention arm and ten from the control arm were interviewed from 11 of the 17 study sites (see Table 1). There were no apparent differences between the sites regarding the issues raised by trial participants and therapists. We had a good range in terms of size and rural/urban sites across the 11 sites represented in the interview study.

Interviews were carried out with 11/44 (25%) physiotherapists (all female) from six study sites. Ten were interviewed in pairs and one individually. The physiotherapists had treated between one and 16 trial participants (median 5) and were based at hospitals that did not routinely provide postoperative physiotherapy after breast cancer surgery. They were experienced in the management of musculoskeletal conditions but did not currently work in breast cancer or oncology units. Some physiotherapists had experience of treating people with breast cancer presenting with problems such as restricted shoulder movement preventing the start of radiotherapy. One physiotherapist had past experience working on a cancer inpatient ward.

Table 1 - Study sample (trial participants)

| Characteristic                          | Intervention arm N=10 | Control arm N=10 |
|-----------------------------------------|-----------------------|------------------|
| Months since randomisation, mean(range) | 7 (3-11)              | 7 (3-12)         |
| Age at randomisation, mean (range)      | 51 (28-69)            | 60 (44-79)       |

|                      |                            |    |
|----------------------|----------------------------|----|
| Age at randomisation |                            |    |
|                      | 18-29                      | 1  |
|                      | 30-39                      | 0  |
|                      | 40-49                      | 4  |
|                      | 50-59                      | 3  |
|                      | 60-69                      | 2  |
|                      | 70-79                      | 0  |
| Ethnicity            |                            |    |
|                      | White                      | 9  |
|                      | Mixed                      | 1  |
| Surgical treatment*  |                            |    |
|                      | Mastectomy                 | 4  |
|                      | Breast conserving surgery  | 6  |
|                      | Axillary node clearance    | 10 |
|                      | Sentinel lymph node biopsy | 3  |
| Adjuvant therapy*    |                            |    |
|                      | Chemotherapy               | 9  |
|                      | Radiotherapy               | 9  |

\*participants had multiple treatments

We identified three themes from the data: 'healing'; 'being the perfect therapist'; and 'delivering physiotherapy to women with breast cancer'. The themes and subthemes are illustrated by participant group in Table 2, and each theme is described below with subthemes.

Table 2 - Illustration of themes and subthemes by participant group

| Theme                                                | Subtheme                                                       | Intervention group                                                                                                                      | Control group                                                                                         | Physiotherapists                                                                                                                                                                                                                                                                                                                                                                                                                                                               |
|------------------------------------------------------|----------------------------------------------------------------|-----------------------------------------------------------------------------------------------------------------------------------------|-------------------------------------------------------------------------------------------------------|--------------------------------------------------------------------------------------------------------------------------------------------------------------------------------------------------------------------------------------------------------------------------------------------------------------------------------------------------------------------------------------------------------------------------------------------------------------------------------|
| Healing                                              | Reassurance                                                    | <i>The physiotherapist was able to tell you whether you were doing things right or wrong</i>                                            | <i>It's quite tender...you don't feel like you ought to be doing it...you feel like it's too soon</i> | <i>They think they're going to split their stitches...it's just the reassurance we give</i>                                                                                                                                                                                                                                                                                                                                                                                    |
|                                                      | Making progress                                                | <i>You saw results and sometimes with your cancer...you don't see results until the end</i>                                             | <i>I'm tender but I suppose that will go</i>                                                          |                                                                                                                                                                                                                                                                                                                                                                                                                                                                                |
|                                                      | Helping myself                                                 | <i>I think it was because you were doing something, because so much of cancer care is being done to you</i>                             | <i>It still gets stiff now but you just have to deal with it.</i>                                     | <i>They had the confidence to do it for themselves</i>                                                                                                                                                                                                                                                                                                                                                                                                                         |
|                                                      | Looking ahead                                                  | <i>Now I'm just doing the massage for lymphoedema and exercises only if I feel the problem</i>                                          |                                                                                                       |                                                                                                                                                                                                                                                                                                                                                                                                                                                                                |
| Being the 'perfect' therapist                        |                                                                | <i>she asked me how I felt and it was very much about me and my progress</i>                                                            |                                                                                                       | <i>It almost like it made you be the perfect physio and the perfect way you should treat patients but you don't always have time to do that</i>                                                                                                                                                                                                                                                                                                                                |
| Delivering physiotherapy to women with breast cancer | Meeting the needs of women with breast cancer                  | <i>I stopped doing the exercises for three or four days if I was ill and after that it was more difficult to do the exercises after</i> |                                                                                                       | <i>they'd start their chemotherapy and then it was a whole different ball game because it was just kind of managing their fatigue and we struggled to get people back in for appointments</i>                                                                                                                                                                                                                                                                                  |
|                                                      | Emotional support for physiotherapists                         |                                                                                                                                         |                                                                                                       | <i>there were times where it was upsetting to hear</i>                                                                                                                                                                                                                                                                                                                                                                                                                         |
|                                                      | Physiotherapists' time, skills, and organisational integration |                                                                                                                                         |                                                                                                       | <i>I would say giving them the choice of exercise is time consuming which you wouldn't have in real life, you wouldn't have the time</i><br><br><i>There's not necessarily the integration with like the nurses or the lymphedema team, we are quite a separate team</i><br><br><i>Being able to advise people a bit more around like scar massage or kind of...any of the manual treatments that we could've done and when is right and wrong to use them [was difficult]</i> |

## Healing

This theme refers to trial participants' and physiotherapists' comments about how the exercise intervention shaped the experience of healing for the women with breast cancer.

### *Reassurance*

In the acute period after surgery, participants from both the intervention and control groups reported feeling afraid to move their upper body. This is known as kinesiophobia [33, 34]. They felt unable to do the exercises prescribed in the Breast Cancer Care information leaflet.

*It's quite tender...you don't feel like you ought to be doing it...you feel like it's too soon...I was aching so much that I just thought 'I just can't do this'. – Qualitative Respondent (QR24) (Age 51, Control arm participant)*

*Because you don't know whether it's good or not, do you know what I mean, you don't know if you're doing well or not or if this is where you would be, you know, or you should be and it was quite nice because you got 'oh no you're doing really well' or 'oh yeah that will be tight' and it was that... it was quite nice to have the feedback – QR12 (Age 55, Intervention arm participant)*

Participants allocated to the intervention arm subsequently felt reassured by physiotherapists that they were capable and able to move. They felt reassured that bodily sensations, such as stiffness, were normal and not something to worry about. Physiotherapists felt that they were able to increase participants' confidence in moving their bodies, and that this lifted participants' confidence more broadly.

*The, er, physiotherapist...was able to tell you whether you were doing things right or wrong or how things were going within your body. – QR09 (Age 69, Intervention arm participant)*

Interviewer: What do you think they get out of coming to see you?

PT02 (Physiotherapist): *I think confidence. Confidence to actually move...confidence to look after themselves, that they can do things*

Some described this as giving participants 'permission' to move, which was necessary to prevent movement restrictions in the upper body.

## Making progress

This theme refers to physical improvements felt by participants in the intervention arm. This included how far they could stretch and how strong they were. Improvements were measurable and tangible, and participants highlighted the central role of the physiotherapist in creating this sense of progress.

*You saw results and sometimes with your cancer...you don't see results until the end 'til they say 'You're all clear' you are just going through awful, awful, awful praying and hoping...But it is a really positive thing to think 'Oh something is getting better'. – QR12 (Age 55, Intervention arm participant, participant's emphasis)*

*You could kind of measure it yourself and assess it yourself because you knew how far you could get your arm up...You could feel when, when things started to get a bit better. – QR08 (Age 43, Intervention arm participant)*

Where intervention participants spoke about the improvement they felt in the months following their surgery, control arm participants also spoke about improvement, but for them this remained an ongoing process even more than 12 months on.

*When I'm washing myself and, and if I touch myself I'm tender but I suppose that will go – QR17 (Age 67, Control arm participant)*

*I have still got a seroma on my chest which is a bit of a nuisance which is, um, sort of swelling of fluid isn't it. Um, it's less than it was and I think it's gradually going 'cause it was enormous at the very beginning but it's getting less – QR16 (age 79, Control arm participant)*

Over time, intervention participants progressed from gentle stretching to more advanced stretching and strengthening exercises as they improved. Graduating to harder exercises gave them a sense of achievement.

*When we would do the exercises and when we would move the kind of categories in the folder that was given, that made me feel good and made me want to kind of continue. – QR13 (Age 28, Intervention arm participant)*

Progression was fulfilling and rewarding, particularly in the context of cancer treatment where a sense that they were improving or getting better was lacking. To be able to measurably perceive progress in strength and movement helped to restore a sense of bodily autonomy for the women who felt disempowered by cancer

1  
2  
3 treatment. During this profoundly difficult time of undergoing cancer treatment, feeling improvement and  
4 graduating to harder exercises helped them to feel that they *were* getting better, at least in some way.  
5  
6  
7

### 8 *Helping myself*

9

10  
11 During breast cancer treatment, women passively receive treatment [7-9, 35]. One participant described it as being  
12 “a professional waiter, you just sit and wait, and you just let everyone do what they're doing” - QR23 (Age 62,  
13 Control arm participant).  
14  
15

16  
17 In collaboration with their physiotherapist, participants receiving the exercise intervention could choose which  
18 exercises they performed from a menu, selecting exercises they felt most confident and comfortable doing. The  
19 physiotherapists felt that joint-decision making was a patient-centred approach which added to trial participants’  
20 sense of ownership and control of their exercises. Physiotherapists and participants both noted that this gave  
21 participants an opportunity to be pro-active, taking control of one aspect of their recovery. This sense of  
22 responsibility and ownership motivated them to exercise.  
23  
24  
25  
26  
27  
28

29  
30 *I think it was more than the exercise. I think it was because you were doing something, because so much*  
31 *of um cancer care is being done to you...It was just quite nice to have something proactive for you to do*  
32 *rather than just turn up and have the drugs. – QR12 (Age 55, Intervention arm participant)*  
33  
34  
35

36  
37 *I think when we were sort of promoting why we think the exercises were useful I talked about self-*  
38 *determination this is something that you can do for yourself and your care...particularly the way it was*  
39 *designed that enabled the patients to say well we could do this exercise or we could do that one. – PT10*  
40  
41 (Physiotherapist)  
42  
43  
44  
45  
46

47 This was a key difference to the control arm interviewees. Most control arm participants spoke about accepting  
48 postoperative problems or just waiting for them to improve over time, apart from a few highly motivated  
49 individuals who described inventing their own exercises.  
50  
51

52  
53 *Lifting up now and I can feel the stretching down that left-hand side, but, um, you know I don't know, I*  
54 *suppose it's had trauma. – QR15 (Age 44, Control arm participant)*  
55  
56  
57

58 *The tightness on my chest does limit movement sometimes and it's sort of more of a discomfort than a*  
59 *pain and just a blessed nuisance really but everyone I've seen says it's normal that they take a while and*  
60



1  
2  
3 *it's nothing they can do so it will just go when it's ready I suppose and I kind of live with it – QR17 (Age*  
4  
5 *67, Control arm participant)*

6  
7  
8 Wanting to be a 'good patient' and doing as one was told motivated control group participants to follow the  
9  
10 exercises on the Breast Cancer Care leaflet.

11  
12 *Well I'd like to think I was a good patient, I started my exercises the day after I came out of hospital. –*  
13  
14 *QR26 (Age 56, Control arm participant)*

15  
16 *Just the fact that the hospital gave them you and, you know, they know what they're talking about. You*  
17  
18 *do it because you've been told to. – QR23 (Age 62, Control arm participant)*

19  
20  
21 This is in contrast to the sense of self-determination, control, and progress described by participants receiving the  
22  
23 intervention.

### 24 25 26 *Looking ahead*

27  
28  
29 Some participants continued to draw on knowledge gained from the intervention to alleviate ongoing problems  
30  
31 with tightness and stiffness, and appeared to feel quite confident in managing this in the future.

32  
33  
34  
35  
36 *Now I'm just doing the massage for lymphoedema and exercises only if I feel the problem...For example*  
37  
38 *if, if I feel the problem to reach the shelf I'm taking [the] band and I might warm it up just do the exercises*  
39  
40 *with the elastic band exactly for this movement. – QR10 (Age 50, Intervention arm participant)*

41  
42  
43 *In a couple of months or so, I would like to kind of start using weights so that I can strengthen my*  
44  
45 *arms...It's kind of like building up the strength that I was building towards whilst I was doing the*  
46  
47 *[PROSPER] exercises before. – QR13 (Age 28, Intervention arm participant)*

48  
49 They felt assured that continuing with such activities would help them, and that they would know what to do or  
50  
51 where to seek help if required.

## Being the 'perfect' therapist

This theme describes the physiotherapists' perspectives on the trial intervention compared to their usual practice and how it enabled them to deliver an optimal service.

*It almost like it made you be the perfect physio and the perfect way you should treat patients but you don't always have time to do that. – PT03 (Physiotherapist)*

*Agreed goals [and] agreed exercises actually that should be what we're doing anyway that shouldn't be anything radically different but sometimes because of time pressures you don't...If you work more collaboratively with patients there are massive benefits to it and I think it just reinforced that for me. – PT10 (Physiotherapist)*

This was supported by participant responses, where they described the relationship they built with their physiotherapist.

*For me, you know, having the same... the same desired outcome as the physiotherapist and [wife] you know, kind of, being all, all, all wanting the same thing. And it kind of felt if I did those things then I would eventually achieve it. – QR08 (Age 43, Intervention arm participant)*

*She's brilliant, she's so lovely and fantastic hugger that's what I found if somebody you meet is happy to give you a hug when you are in this kind of situation it... it just makes everything so much easier... you [physiotherapists] not only do you do your jobs but when you're dealing with people like me you are counsellors as well – QR12 (Age 55, Intervention arm participant)*

Physiotherapists felt that having longer appointment times and an emphasis on shared goals and shared decisions, both of which encouraged exercise adherence, represented an ideal way of working. Many of the therapists remarked that they were pleased to be able to offer this service to people with breast cancer because of their previous experience of treating women struggling with chronic immobility, pain, and psychological issues in the longer term as a result of shoulder problems following breast cancer surgery.

*When you pick up those patients [later] they come with a lot of emotional baggage and sort of their belief systems and it may have been years since they used their shoulder normally and then you know again if you've got body dysmorphic issues and they've been carrying that around for two years that's a lot more challenging to support. – PT06 (Physiotherapist)*

1  
2  
3 *We get people coming in about two years later and they've never touched their scar, they never saw a*  
4 *physio, they're stiff, their scar's horrible, they've got awful myofascial trigger points and*  
5 *tightness...They still think two years down the line they're going to hurt themselves if they over stretch*  
6  
7 *so if you get them in at the early stage then it's just better...I had a lady who had a mastectomy it was*  
8  
9 *three years later she never went back to work, she never went back to any exercise, she never touched*  
10  
11 *her scar, her mental wellbeing was like absolutely awful when I first started seeing her because she just*  
12  
13 *didn't even know that she could have her life back. – PT01 (Physiotherapist)*  
14  
15  
16

17 Physiotherapists connected this to the broader organisation of the NHS, and the need allocate resources to  
18 preventive care.  
19

20  
21 *I think we work too much reactive in the NHS don't we and I think a direction to move in is work in*  
22 *prevention rather than cure. – PT02 (Physiotherapist)*  
23  
24  
25  
26  
27  
28  
29  
30

## 31 **Delivering physiotherapy to women with breast cancer**

32

33  
34 This theme reports views on delivering a new physiotherapist-led intervention for individuals with breast cancer.  
35

### 36 *Meeting the needs of women with breast cancer*

37  
38  
39

40 Participants and physiotherapists suggested that adjuvant treatment, such as chemotherapy, interfered with the  
41 participants' ability to maintain the exercise programme. After stopping the exercises when they felt unwell, it  
42 was physically more difficult to start doing the exercises again. Physiotherapists reflected that intervening at this  
43 point may have helped encourage and motivate participants to continue.  
44  
45  
46  
47

48 *On day 17 after chemotherapy it has been a struggle...the last three weeks with the first lot of chemo*  
49 *this...[doing the exercises has] been a lot harder than I ever anticipated. – QR11 (Age 49, Intervention*  
50 *arm participant)*  
51  
52  
53

54 *A patient would come in for their first appointment and probably just post-surgery and most of them*  
55 *were quite positive had quite a lot of goals... they'd start their chemotherapy and then it was a whole*  
56  
57  
58  
59  
60

1  
2  
3 *different ball game because it was just kind of managing their fatigue and we struggled to get people*  
4 *back in for appointments. – PT02 (Physiotherapist)*  
5  
6

7 The physiotherapists noted that participants needed emotional support, and that it was difficult to provide this in  
8 a curtained cubicle in an open-plan space, where they potentially felt more vulnerable.  
9

10  
11  
12 *We're working in curtained cubicles a lot of the time and I felt that didn't set the tone, I think if you're*  
13 *asking someone to take their bra off. – PT10 (Physiotherapist)*  
14  
15

16  
17  
18 Two therapists felt that physiotherapists should be female as they would better understand the meaning of losing  
19 a breast and more able to engage in the emotional and physical work of treating women with breast cancer.  
20

21  
22  
23 *They would probably connect better with a female and I was surprised how much women wanted to talk*  
24 *to me about their connection with their breasts so for a lot of them they felt like that was their femininity*  
25 *or that was um a connection to their womanhood and so I think most guys couldn't relate to how that*  
26 *feels so I could get where they were coming from. – PT08 (Physiotherapist)*  
27  
28  
29

30  
31 This issue was not mentioned by the trial participants we interviewed.  
32

### 33 *Emotional support for physiotherapists*

34  
35  
36  
37 Physiotherapists typically provide emotional support to their patients, however, some therapists highlighted  
38 particular challenges in relation to this group due to the context of cancer treatment, for example, people with  
39 cancer were fearful of dying from breast cancer. This was in contrast to their usual caseload which often involved  
40 caring for people with chronic musculoskeletal conditions.  
41  
42  
43

44  
45 *I am a person who cries quite easily so I was like 'Ok I need to keep things under control myself*  
46 *because I am the professional' ... If I was to do it longer term I would need some better kind of*  
47 *guidance and help to deal with that...sometimes I felt a little bit lost. – PT08 (Physiotherapist)*  
48  
49

50  
51  
52 *We were lucky because we had each other but there were times where it was upsetting to hear...If we*  
53 *were permanent members of staff in oncology you would be given some...de-briefing or kind of*  
54 *decompression but we were never offered that... both of us have had very close relatives die because of*  
55 *cancer...nobody considered that at all. – PT06 (Physiotherapist)*  
56  
57  
58  
59  
60

1  
2  
3 The physiotherapists felt they would need emotional support if they worked routinely with people with breast  
4 cancer.  
5  
6

### 8 *Physiotherapists' time, skills, and organisational integration*

9

10 Delivering the intervention was time-consuming for physiotherapists.

11  
12  
13 *I would say giving them the choice of exercise is time consuming which you wouldn't have in real life,*  
14 *you wouldn't have the time. – PT09 (Physiotherapist)*  
15  
16

17  
18 Trial appointments were longer than usual and there were doubts about how this could be practically implemented  
19 as part of routine NHS clinical care given current time restrictions on appointments. The physiotherapists felt  
20 confident in identifying and treating physical shoulder problems, but often expressed a need for training about  
21 breast cancer, its treatments, and cancer specific complications. Cording, lymphedema, and seroma were  
22 unfamiliar postoperative complications to some physiotherapists until they took part in the trial.  
23  
24  
25  
26

27  
28 *We are MSK [musculoskeletal] physios and we know what a tight shoulder is and we know how to get*  
29 *it moving, so actually the assessment and the exercises wasn't so much of a worry, but patients*  
30 *occasionally asked me a question that maybe I couldn't answer...the background behind the cancer, a*  
31 *bit more about the actual surgical techniques they did and why and a little bit more about the*  
32 *reasoning of why lymphedema and cording does actually develop and what it means, I might have*  
33 *benefitted from more training from that aspect. – PT03 (Physiotherapist)*  
34  
35  
36  
37  
38

39  
40 *Being able to advise people a bit more around like scar massage or kind of...any of the manual*  
41 *treatments that we could've done and when is right and wrong to use them [was difficult]. – PT02*  
42  
43  
44 (Physiotherapist)  
45

46  
47 Physiotherapists felt disconnected from the surgical or oncology team treating the person with breast cancer which  
48 was challenging.  
49

50  
51 *There's not necessarily the integration with like the nurses or the lymphedema team, we are quite a*  
52 *separate team from them so I think it does need to be a multi-disciplinary approach and because we're*  
53 *not involved with them it makes it a little bit difficult [to know] whether we should or shouldn't be*  
54 *doing those interventions. – PT03 (Physiotherapist)*  
55  
56  
57  
58  
59  
60

1  
2  
3 *I sometimes found it difficult to ask about things like chemo, radiotherapy and repeat surgeries*  
4 *because I almost felt like it was something that I should know... that's what I'd want as a healthcare*  
5 *professional I want them to know what's going on I shouldn't have to tell you when I am having my*  
6 *chemo or this is happening. – PT05 (Physiotherapist)*  
7  
8  
9

10  
11 Better integration with the oncology team would have given them greater understanding of the specific  
12 individual's treatment schedule as they sometimes felt uncertain about whether the interventions were appropriate  
13 at a particular stage of cancer treatment.  
14  
15  
16  
17  
18  
19  
20  
21

## 22 Discussion

23  
24  
25

26 This qualitative study embedded within a large multicentre clinical trial makes a unique contribution to the  
27 literature. Our study illustrates that an individual supported exercise intervention is perceived as acceptable and  
28 beneficial by both women with breast cancer and physiotherapists. Comparing the intervention and control arm  
29 enabled us to demonstrate that the intervention helped participants feel empowered and regaining a sense of  
30 control, whereas participants in the control arm spoke of passively accepting the upper limb limitations they  
31 experienced. Previous studies have explored perceptions of exercise in the context of an exercise intervention [36-  
32 38], but this is the first to include the perspectives of both intervention and control group participants, as well as  
33 physiotherapists delivering the intervention. We gained multiple perspectives on the same issue, and included all  
34 stakeholders in the study. This allowed us to triangulate and identify themes which were present across all groups.  
35 By using qualitative methods, we elicited the particular elements of the intervention which helped motivate  
36 participants, and those which were easier or more difficult to deliver in the clinical setting. This intervention is  
37 the first early structured physiotherapy-led home-based exercise intervention to be tested in women with breast  
38 cancer in the UK. An understanding of the acceptability of the intervention to women with breast cancer and  
39 physiotherapists will inform future implementation strategies if the intervention is clinically and cost-effective.  
40  
41  
42  
43  
44  
45  
46  
47  
48  
49  
50  
51  
52

53 Uncertainty has been identified as a feature of the experience of cancer [39, 29]. The subtheme of 'making  
54 progress' showed how witnessing improvement for themselves in terms of strength and stretching stood out in  
55 sharp contrast with the uncertainty surrounding cancer and its treatment. Participants also gained a sense of control  
56 over their progress, through being involved in choosing exercises, and through taking responsibility for  
57  
58  
59  
60

1  
2  
3 completing their exercises each day (subthemes of ‘helping myself’ and looking ahead’). This combination  
4 appeared to restore participants’ sense of autonomy over their bodies, and improved their wellbeing as they felt  
5 less disempowered and hopeless. This echoes previous research which found feelings of increased empowerment  
6 when people with breast cancer participated in physical activity during active treatment [40-42]. These  
7 experiences contrasted to those in the control group, who did not experience the same sense of empowerment and  
8 progress. Specific aspects of the intervention which contributed to this sense of control over and above usual care  
9 were the contact with physiotherapists and the reassurance this provided, the sense of progress working through  
10 the prescribed programme as exercises increased in difficulty, and the shared decision-making used to select the  
11 home exercises. Previous research has found that participating in a group activity can be a way of forgetting about  
12 the illness [36]. Our study illustrates this can also be true for home-based or individually supported exercise  
13 programmes.

14  
15  
16  
17  
18  
19  
20  
21  
22  
23  
24  
25 Being diagnosed with a serious illness such as cancer can cause an individual to lose trust and confidence in their  
26 bodily knowledge and of what their bodies are capable of doing [12, 43-45]. The women in this study reported  
27 kinesiophobia (fear of movement) in the acute period following surgery, but those in the intervention arm felt the  
28 intervention helped them overcome this (subtheme of ‘reassurance’). Kinesiophobia has been shown to be  
29 associated with lymphoedema and greater pain intensity [33, 34]. Physiotherapists were able to reassure women  
30 that their bodily sensations were normal, and gave them confidence to push themselves physically which  
31 motivated them to adhere to the programme. The interview data suggested that the role of the physiotherapist in  
32 affirming this progress and confidence was crucial. Physiotherapists provided invaluable emotional support, as  
33 participants unburdened onto them and shared their fears about the future and their bodies.

34  
35  
36  
37  
38  
39  
40  
41  
42  
43 The physiotherapists enjoyed seeing positive improvements in the participants, and felt passionate about  
44 delivering what they viewed as high quality care to individuals with breast cancer (subtheme of ‘being the perfect  
45 therapist’). Physiotherapists felt satisfaction in being able to take preventive action against problems arising in the  
46 future for these women. Intervention arm participants also appreciated the supportive nature of the intervention,  
47 sharing decisions and working together towards the same goal. Other authors have called for a more proactive  
48 model of health care provision for this patient group, and identified the need to improve physiotherapists’  
49 confidence in supporting those with breast cancer [46]. Our physiotherapists felt that they needed better integration  
50 with the rest of the individual’s healthcare providers (final subtheme of ‘Physiotherapists’ time, skills, and  
51 organisational integration’). Other studies have also emphasised the importance of aligning expectations and  
52 knowledge about exercise based rehabilitation across the whole cancer care team [5] Challenges to the exercise  
53  
54  
55  
56  
57  
58  
59  
60

1  
2  
3 programme were the side effects of treatment, in particular fatigue, which has been highlighted in other research  
4 as a barrier to exercise for people with breast cancer [36]. If a physiotherapist can provide motivation and  
5 encouragement during chemotherapy, this may improve adherence to exercise. However, it is also important to  
6 ensure that physiotherapists are sympathetic to treatment-related issues, and can tailor programmes during these  
7 periods of fatigue [36].  
8  
9  
10  
11

12  
13 The theme 'Delivering physiotherapy to women with breast cancer' highlighted considerations for the  
14 implementation of an exercise intervention for breast cancer patients. The intervention should be delivered in a  
15 private walled room, ideally with a specifically-trained (female) physiotherapist who is part of the multi-  
16 disciplinary oncology team caring for the person. The most important ingredient of the intervention was contact  
17 with the physiotherapists, suggesting resources should be focused on training and supporting physiotherapists to  
18 provide this care. Some physiotherapists reported feeling upset when treating patients because of the woman's  
19 distress or their own experiences of cancer. This suggests that healthcare professionals caring for oncology  
20 patients should be given the opportunity of debriefing and emotional support. This is an important consideration  
21 when designing future interventions for this group.  
22  
23  
24  
25  
26  
27  
28  
29

30  
31 In the PROSPER trial, participants underwent a one hour assessment and then subsequent 30-minute follow-up  
32 appointments. Routine UK physiotherapy outpatient appointments are often 40 minutes (assessment) and 20  
33 minutes (follow-up). Physiotherapists worked with participants to select the exercises. This may be challenging  
34 to deliver in a resource-stretched NHS context. However, longer appointments with physiotherapists, creating  
35 shared goals, and making shared decisions about exercises, were viewed as the most important ingredients in the  
36 successful delivery of the intervention. This was brought out in all our themes. Other studies have highlighted  
37 how autonomy of choice over exercises may increase motivation and adherence [37, 47]. Additionally, we  
38 provided the PROSPER materials in an attractive ring binder with colour photographs, laminated sheets, and  
39 provided exercise diary handouts. Trial participants said the diary was useful as a prompt to remember to do their  
40 exercises, and it was helpful to see photographs of the exercises.  
41  
42  
43  
44  
45  
46  
47  
48  
49

50  
51 Acting more proactively by providing good access to physiotherapy treatment early after, or alongside, breast  
52 cancer treatment could help to reduce the number of people with cancer (or a history of cancer) presenting with  
53 musculoskeletal complications [48]. Although our physiotherapist-participants felt very comfortable with aspects  
54 of the intervention such as improving shoulder mobility, they expressed a need for greater training, support, and  
55 guidance in relation to specific issues such as cording and lymphoedema. The physiotherapists delivering the  
56  
57  
58  
59  
60



1  
2  
3 PROSPER intervention were musculoskeletal specialists with limited experience in treating individuals with  
4 breast cancer in the acute postoperative period. Physiotherapists in the UK receive little training in rehabilitation  
5 following cancer treatment, reflected by the limited centres across the UK with physiotherapists specialised in  
6 oncology [48]. Given the increasing number of people surviving cancer and living with the consequences of cancer  
7 treatment, there is an urgent need in the UK to upskill physiotherapists in cancer-related rehabilitation to allow  
8 people with breast cancer better access to this type of rehabilitation.  
9  
10  
11  
12  
13  
14  
15

## 16 Conclusion

17  
18  
19  
20 This study has highlighted how a physiotherapist-led home exercise programme, with built-in progression and  
21 shared decision-making, helped women undergoing breast cancer treatment gain a restored sense of control over  
22 their wellbeing, and empowered them during a highly disempowering experience.  
23  
24  
25  
26  
27

## 28 Author statement

29  
30  
31 JB is Chief Investigator of the PROSPER Trial. JB/SR/EW/HR/BM contributed to the study protocol. SR collected  
32 and analysed the data. JB/BM/HR/JB/EW assisted with analysis and interpretation. SR led the writing of the  
33 paper, and all other authors contributed to writing and editing.  
34  
35  
36  
37  
38  
39

## 40 Funding

41  
42  
43 Funding for the PROSPER trial was provided by the Health Technology Assessment programme of the National  
44 Institute for Health Research (NIHR) (Project Number 13/84/10). JB is supported by NIHR Research Capability  
45 Funding via University Hospitals Coventry and Warwickshire. EW is supported by the NIHR Applied Research  
46 Collaboration Oxford and Thames Valley.  
47  
48  
49  
50  
51  
52

## 53 Conflicts of interest

54  
55  
56  
57 The authors have no conflicts of interest.  
58  
59  
60

## Data availability statement

The datasets generated during and/or analysed during the current study are not publicly available due to the need to protect the identity of participants.

## Patient and Public Involvement

Patients partnered with us for the design of the study, the informational material to support the qualitative research, and the burden of the interview from the perspective of women with breast cancer.

## Acknowledgements

We would like to thank all the physiotherapists and trial participants who took part in this interview study. We dedicate this paper to Elizabeth (Lizzie) Abbey (nee Fort) who passed away on 3rd April 2018. Lizzie helped set up the trial and was a highly valued member of the PROSPER team.

## References

1. McNeely ML, Campbell K, Ospina M, Rowe BH, Dabbs K, Klassen TP et al. Exercise interventions for upper-limb dysfunction due to breast cancer treatment. *Cochrane Database Syst Rev*. 2010(6). doi:10.1002/14651858.CD005211.pub2.
2. Mejdahl MK, Andersen KG, Gärtner R, Kroman N, Kehlet H. Persistent pain and sensory disturbances after treatment for breast cancer: six year nationwide follow-up study. *BMJ*. 2013;346:f1865.
3. Cardoso F, Kyriakides S, Ohno S, Penault-Llorca F, Poortmans P, Rubio IT et al. Early breast cancer: ESMO Clinical Practice Guidelines for diagnosis, treatment and follow-up. *Ann Oncol*. 2019. doi:10.1093/annonc/mdz173.
4. Excellence NIHC. Early and locally advanced breast cancer: diagnosis and management NICE guideline [NG101]. 2018. <https://www.nice.org.uk/guidance/ng101/chapter/Recommendations>. Accessed 31st January 2020.
5. Dennett AM, Harding KE, Reed MS. The challenge of timing: a qualitative study on clinician and patient perspectives about implementing exercise-based rehabilitation in an acute cancer treatment setting. *Support Care Cancer*. 2020. doi:10.1007/s00520-020-05436-7.
6. Fisher MI, Howell D. The power of empowerment: An ICF-based model to improve self-efficacy and upper extremity function of survivors of breast cancer. *Rehabil Oncol*. 2010;28(3).
7. Dunn J, Steginga SK. Young women's experience of breast cancer: defining young and identifying concerns. *Psychooncology*. 2000;9(2):137-46.

- 1
- 2
- 3 8. Thomas-MacLean R. Memories of treatment: the immediacy of breast cancer. *Qual Health Res.* 2004;14(5):628-43. doi:10.1177/1049732304263658.
- 4 9. Little M, Jordens CF, Paul K, Montgomery K, Philipson B. Liminality: a major category of the experience of
- 5 cancer illness. *Soc Sci Med.* 1998;47(10):1485-94.
- 6 10. McCann L, Illingworth N, Wengström Y, Hubbard G, Kearney N. Transitional experiences of women with
- 7 breast cancer within the first year following diagnosis. *J Clin Nurs.* 2010;19(13-14):1969-76.
- 8 11. Trusson D, Pilnick A, Roy S. A new normal?: Women's experiences of biographical disruption and
- 9 liminality following treatment for early stage breast cancer. *Soc Sci Med.* 2016.
- 10 12. Rees S. No one scans you and says 'you're alright now': the experience of embodied risk for young women
- 11 living with a history of breast cancer. *Health, Risk & Society.* 2018:1-13. doi:10.1080/13698575.2018.1539468.
- 12 13. Kim S, Han J, Lee MY, Jang MK. The experience of cancer-related fatigue, exercise and exercise adherence
- 13 among women breast cancer survivors: Insights from focus group interviews. *J Clin Nurs.* 2020;29(5-6):758-69.
- 14 doi:10.1111/jocn.15114.
- 15 14. Livsey L, Lewis K. Breast cancer survivors' perceptions of participating in a supervised exercise
- 16 intervention: An exploratory review of the literature. *Women Health.* 2018;58(9):1017-36.
- 17 doi:10.1080/03630242.2017.1372844.
- 18 15. Kenyon K Mres PT, Hebron C PhD PT, Vuoskoski P PhD PT, McCrum C Dprof PT. Physiotherapists'
- 19 experiences of managing upper limb movement impairments due to breast cancer treatment. *Physiother Theory*
- 20 *Pract.* 2018:1-14. doi:10.1080/09593985.2018.1480077.
- 21 16. Bruce J, Williamson E, Lait C, Richmond H, Betteley L, Lall R et al. Randomised controlled trial of
- 22 exercise to prevent shoulder problems in women undergoing breast cancer treatment: study protocol for the
- 23 prevention of shoulder problems trial (UK PROSPER). *BMJ Open.* 2018;8(3):e019078. doi:10.1136/bmjopen-
- 24 2017-019078.
- 25 17. Richmond H, Lait C, Srikesavan C, Williamson E, Moser J, Newman M et al. Development of an exercise
- 26 intervention for the prevention of musculoskeletal shoulder problems after breast cancer treatment: the
- 27 prevention of shoulder problems trial (UK PROSPER). *BMC Health Serv Res.* 2018;18(1):463.
- 28 doi:10.1186/s12913-018-3280-x.
- 29 18. Archer MS. *Realist social theory: The morphogenetic approach.* Cambridge University Press; 1995.
- 30 19. Bhaskar R. *A realist theory of science.* Routledge; 2013.
- 31 20. Braun V, Clarke V. Reflecting on reflexive thematic analysis. *Qualitative Research in Sport, Exercise and*
- 32 *Health.* 2019;11(4):589-97. doi:10.1080/2159676X.2019.1628806.
- 33 21. O'Brien BC, Harris IB, Beckman TJ, Reed DA, Cook DAJAM. Standards for reporting qualitative research:
- 34 a synthesis of recommendations. 2014;89(9):1245-51.
- 35 22. Ltd QIP. NVivo qualitative data analysis software. QSR International Pty Ltd. Stockholm, Sweden; 2008.
- 36 23. Guest G, MacQueen KM, Namey EE. *Applied thematic analysis.* Sage; 2011.
- 37 24. Boyatzis RE. *Transforming qualitative information: Thematic analysis and code development.* sage; 1998.
- 38 25. Charmaz K. *Constructing grounded theory.* Sage; 2014.
- 39 26. Braun V, Clarke V. To saturate or not to saturate? Questioning data saturation as a useful concept for
- 40 thematic analysis and sample-size rationales. *Qualitative Research in Sport, Exercise and Health.* 2019:1-16.
- 41 doi:10.1080/2159676X.2019.1704846.
- 42 27. Hennink MM, Kaiser BN, Marconi VC. Code saturation versus meaning saturation: how many interviews
- 43 are enough? *Qual Health Res.* 2017;27(4):591-608.
- 44 28. Rees S. A qualitative exploration of the meaning of the term "survivor" to young women living with a
- 45 history of breast cancer. *European journal of cancer care.* 2018;27(3):e12847.
- 46 29. Rees S. 'Am I really gonna go sixty years without getting cancer again?' Uncertainty and liminality in young
- 47 women's accounts of living with a history of breast cancer. *Health.* 2017;21(3):241-58.
- 48 doi:10.1177/1363459316677628.
- 49 30. Rees S, Young A. The experiences and perceptions of women diagnosed with breast cancer during
- 50 pregnancy. *Asia-Pacific journal of oncology nursing.* 2016;3(3):252-8. doi:10.4103/2347-5625.189814.
- 51 31. Hutchinson A, Rees S, Young A, Maraveyas A, Date K, Johnson MJ. Oral anticoagulation is preferable to
- 52 injected, but only if it is safe and effective: An interview study of patient and carer experience of oral and
- 53 injected anticoagulant therapy for cancer-associated thrombosis in the select-d trial. *Palliat Med.*
- 54 2019;33(5):510-7.
- 55 32. Lincoln YS, Guba EG. But is it rigorous? Trustworthiness and authenticity in naturalistic evaluation. *New*
- 56 *directions for program evaluation.* 1986;1986(30):73-84.
- 57 33. Gencay Can A, Can SS, Ekşioğlu E, Çakıcı FA. Is kinesiophobia associated with lymphedema, upper
- 58 extremity function, and psychological morbidity in breast cancer survivors? *Turkish journal of physical*
- 59 *medicine and rehabilitation.* 2018;65(2):139-46. doi:10.5606/tftrd.2019.2585.
- 60

- 1  
2  
3 34. Martinez-Calderon J, Struyf F, Meeus M, Luque-Suarez A. The association between pain beliefs and pain  
4 intensity and/or disability in people with shoulder pain: A systematic review. *Musculoskelet Sci Pract.*  
5 2018;37:29-57. doi:10.1016/j.msksp.2018.06.010.
- 6 35. Trusson D. *Living with a new normal: women's experiences following treatment for early-stage breast*  
7 *cancer or DCIS: University of Nottingham; 2013.*
- 8 36. Browall M, Mijwel S, Rundqvist H, Wengstrom Y. Physical Activity During and After Adjuvant Treatment  
9 for Breast Cancer: An Integrative Review of Women's Experiences. *Integr Cancer Ther.* 2018;17(1):16-30.  
10 doi:10.1177/1534735416683807.
- 11 37. Ingram C, Wessel J, Courneya KS. Women's perceptions of home-based exercise performed during adjuvant  
12 chemotherapy for breast cancer. *Eur J Oncol Nurs.* 2010;14(3):238-43. doi:10.1016/j.ejon.2010.01.027.
- 13 38. Luoma ML, Hakamies-Blomqvist L, Blomqvist C, Nikander R, Gustavsson-Lilius M, Saarto T. Experiences  
14 of breast cancer survivors participating in a tailored exercise intervention -a qualitative study. *Anticancer Res.*  
15 2014;34(3):1193-9.
- 16 39. Halliday LE, Boughton MA, Kerridge I. Mothering and self-othering: The impact of uncertain reproductive  
17 capability in young women after hematological malignancy. *Health Care Women Int.* 2014;35(3):249-65.
- 18 40. Husebo AM, Karlsen B, Allan H, Soreide JA, Bru E. Factors perceived to influence exercise adherence in  
19 women with breast cancer participating in an exercise programme during adjuvant chemotherapy: a focus group  
20 study. *J Clin Nurs.* 2015;24(3-4):500-10. doi:10.1111/jocn.12633.
- 21 41. Crane-Okada R, Kiger H, Anderson NL, Carroll-Johnson RM, Sugerman F, Shapiro SL et al. Participant  
22 perceptions of a mindful movement program for older women with breast cancer: focus group results. *Cancer*  
23 *Nurs.* 2012;35(3):E1-10. doi:10.1097/NCC.0b013e31822539c5.
- 24 42. Bulmer SM, Howell J, Ackerman L, Fedric R. Women's perceived benefits of exercise during and after  
25 breast cancer treatment. *Women Health.* 2012;52(8):771-87. doi:10.1080/03630242.2012.725707.
- 26 43. Williams SJ. The vicissitudes of embodiment across the chronic illness trajectory. *Body & Society.*  
27 1996;2(2):23-47.
- 28 44. Lindwall L, Bergbom I. The altered body after breast cancer surgery. *International Journal of Qualitative*  
29 *Studies on Health and Well-being.* 2009;4(4):280-7.
- 30 45. Crouch M, McKenzie H. Social realities of loss and suffering following mastectomy. *Health.*  
31 2000;4(2):196-215.
- 32 46. Levangie PK, Santasier AM, Stout NL, Pfalzer L. A qualitative assessment of upper quarter dysfunction  
33 reported by physical therapists treated for breast cancer or treating breast cancer sequelae. *Support Care Cancer.*  
34 2011;19(9):1367-78. doi:10.1007/s00520-010-0959-x.
- 35 47. Jones LW, Courneya KS, Fairey AS, Mackey JR. Does the theory of planned behavior mediate the effects of  
36 an oncologist's recommendation to exercise in newly diagnosed breast cancer survivors? Results from a  
37 randomized controlled trial. *Health Psychol.* 2005;24(2):189.
- 38 48. Robinson M, Ward L, Mehanna H, Paleri V, Winter SC. Provision of physiotherapy rehabilitation following  
39 neck dissection in the UK. *The Journal of Laryngology & Otology.* 2018;132(7):624-7.  
40 doi:10.1017/S0022215118000671.
- 41  
42  
43  
44  
45  
46  
47  
48  
49  
50  
51  
52  
53  
54  
55  
56  
57  
58  
59  
60

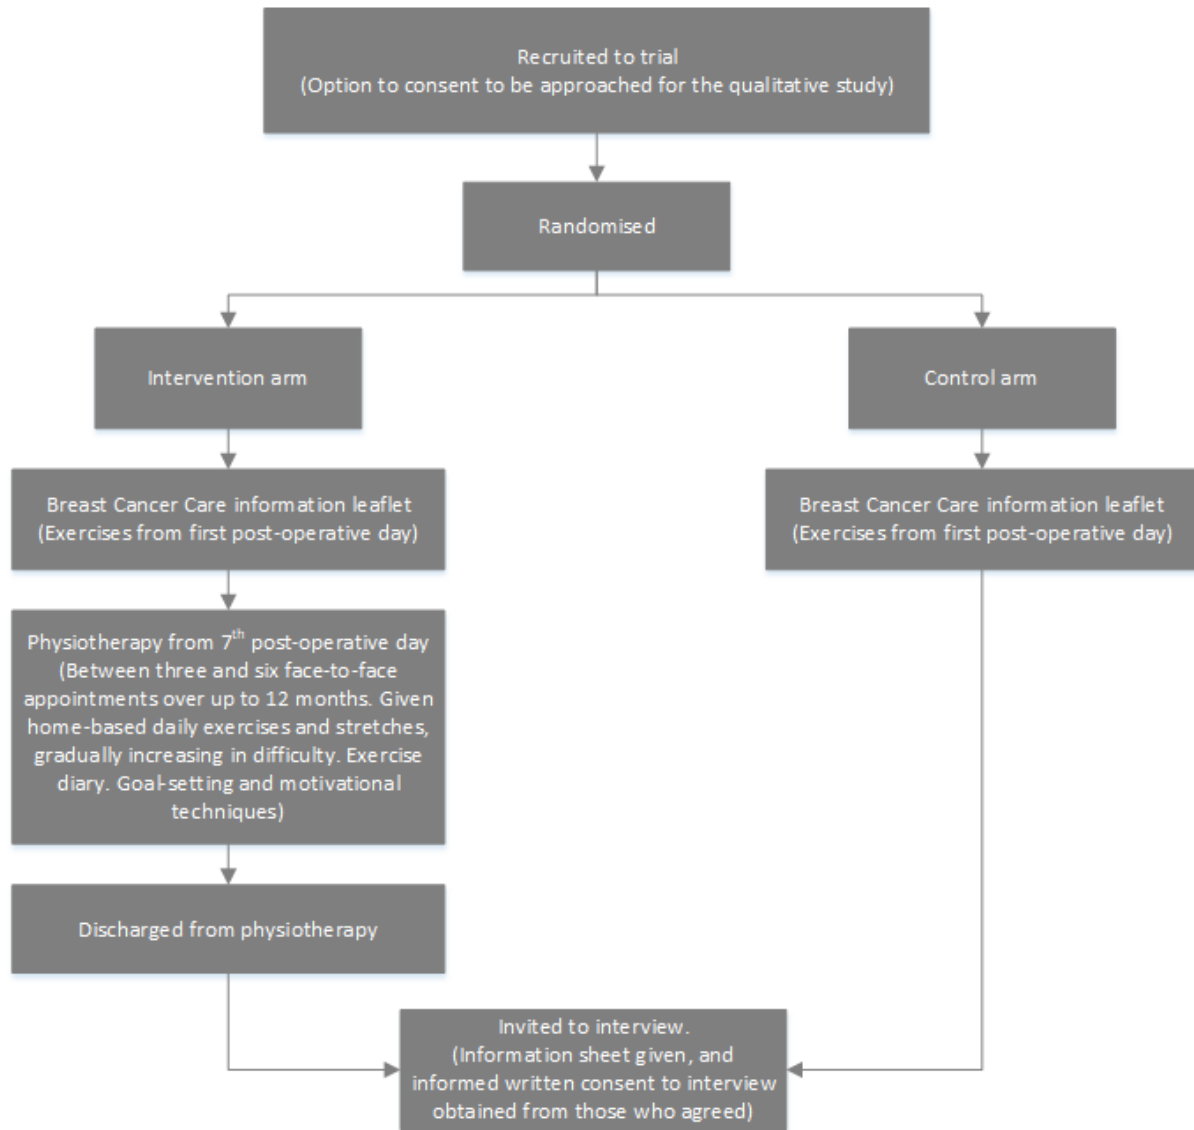

## Standards for Reporting Qualitative Research (SRQR)\*

<http://www.equator-network.org/reporting-guidelines/srqr/>

Page/line no(s).

### Title and abstract

|                                                                                                                                                                                                                                                              |     |
|--------------------------------------------------------------------------------------------------------------------------------------------------------------------------------------------------------------------------------------------------------------|-----|
| <p><b>Title</b> - Concise description of the nature and topic of the study Identifying the study as qualitative or indicating the approach (e.g., ethnography, grounded theory) or data collection methods (e.g., interview, focus group) is recommended</p> | 1   |
| <p><b>Abstract</b> - Summary of key elements of the study using the abstract format of the intended publication; typically includes background, purpose, methods, results, and conclusions</p>                                                               | 1-2 |

### Introduction

|                                                                                                                                                                     |     |
|---------------------------------------------------------------------------------------------------------------------------------------------------------------------|-----|
| <p><b>Problem formulation</b> - Description and significance of the problem/phenomenon studied; review of relevant theory and empirical work; problem statement</p> | 3-4 |
| <p><b>Purpose or research question</b> - Purpose of the study and specific objectives or questions</p>                                                              | 4   |

### Methods

|                                                                                                                                                                                                                                                                                                                                                                                                             |     |
|-------------------------------------------------------------------------------------------------------------------------------------------------------------------------------------------------------------------------------------------------------------------------------------------------------------------------------------------------------------------------------------------------------------|-----|
| <p><b>Qualitative approach and research paradigm</b> - Qualitative approach (e.g., ethnography, grounded theory, case study, phenomenology, narrative research) and guiding theory if appropriate; identifying the research paradigm (e.g., postpositivist, constructivist/ interpretivist) is also recommended; rationale**</p>                                                                            | 5   |
| <p><b>Researcher characteristics and reflexivity</b> - Researchers' characteristics that may influence the research, including personal attributes, qualifications/experience, relationship with participants, assumptions, and/or presuppositions; potential or actual interaction between researchers' characteristics and the research questions, approach, methods, results, and/or transferability</p> | 6-7 |
| <p><b>Context</b> - Setting/site and salient contextual factors; rationale**</p>                                                                                                                                                                                                                                                                                                                            | 5   |
| <p><b>Sampling strategy</b> - How and why research participants, documents, or events were selected; criteria for deciding when no further sampling was necessary (e.g., sampling saturation); rationale**</p>                                                                                                                                                                                              | 5   |
| <p><b>Ethical issues pertaining to human subjects</b> - Documentation of approval by an appropriate ethics review board and participant consent, or explanation for lack thereof; other confidentiality and data security issues</p>                                                                                                                                                                        | 6   |
| <p><b>Data collection methods</b> - Types of data collected; details of data collection procedures including (as appropriate) start and stop dates of data collection and analysis, iterative process, triangulation of sources/methods, and modification of procedures in response to evolving study findings; rationale**</p>                                                                             | 6   |

|                       |                                                                                                                                                                                                                                                       |     |
|-----------------------|-------------------------------------------------------------------------------------------------------------------------------------------------------------------------------------------------------------------------------------------------------|-----|
| 1<br>2<br>3<br>4<br>5 | <b>Data collection instruments and technologies</b> - Description of instruments (e.g., interview guides, questionnaires) and devices (e.g., audio recorders) used for data collection; if/how the instrument(s) changed over the course of the study | 6   |
| 6<br>7<br>8           | <b>Units of study</b> - Number and relevant characteristics of participants, documents, or events included in the study; level of participation (could be reported in results)                                                                        | 7-8 |
| 9<br>10<br>11<br>12   | <b>Data processing</b> - Methods for processing data prior to and during analysis, including transcription, data entry, data management and security, verification of data integrity, data coding, and anonymization/de-identification of excerpts    | 6   |
| 13<br>14<br>15<br>16  | <b>Data analysis</b> - Process by which inferences, themes, etc., were identified and developed, including the researchers involved in data analysis; usually references a specific paradigm or approach; rationale**                                 | 6   |
| 17<br>18<br>19<br>20  | <b>Techniques to enhance trustworthiness</b> - Techniques to enhance trustworthiness and credibility of data analysis (e.g., member checking, audit trail, triangulation); rationale**                                                                | 6-7 |

### Results/findings

|                      |                                                                                                                                                                                                   |       |
|----------------------|---------------------------------------------------------------------------------------------------------------------------------------------------------------------------------------------------|-------|
| 23<br>24<br>25<br>26 | <b>Synthesis and interpretation</b> - Main findings (e.g., interpretations, inferences, and themes); might include development of a theory or model, or integration with prior research or theory | 9     |
| 27<br>28<br>29       | <b>Links to empirical data</b> - Evidence (e.g., quotes, field notes, text excerpts, photographs) to substantiate analytic findings                                                               | 10-18 |

### Discussion

|                                  |                                                                                                                                                                                                                                                                                                                                                                                                             |       |
|----------------------------------|-------------------------------------------------------------------------------------------------------------------------------------------------------------------------------------------------------------------------------------------------------------------------------------------------------------------------------------------------------------------------------------------------------------|-------|
| 32<br>33<br>34<br>35<br>36<br>37 | <b>Integration with prior work, implications, transferability, and contribution(s) to the field</b> - Short summary of main findings; explanation of how findings and conclusions connect to, support, elaborate on, or challenge conclusions of earlier scholarship; discussion of scope of application/generalizability; identification of unique contribution(s) to scholarship in a discipline or field | 18-20 |
| 38<br>39                         | <b>Limitations</b> - Trustworthiness and limitations of findings                                                                                                                                                                                                                                                                                                                                            | 3     |

### Other

|                |                                                                                                                                               |         |
|----------------|-----------------------------------------------------------------------------------------------------------------------------------------------|---------|
| 42<br>43<br>44 | <b>Conflicts of interest</b> - Potential sources of influence or perceived influence on study conduct and conclusions; how these were managed | 6-7, 21 |
| 45<br>46       | <b>Funding</b> - Sources of funding and other support; role of funders in data collection, interpretation, and reporting                      | 21      |

\*The authors created the SRQR by searching the literature to identify guidelines, reporting standards, and critical appraisal criteria for qualitative research; reviewing the reference lists of retrieved sources; and contacting experts to gain feedback. The SRQR aims to improve the transparency of all aspects of qualitative research by providing clear standards for reporting qualitative research.

1  
2  
3  
4  
5  
6  
7  
8  
9  
10  
11  
12  
13  
14  
15  
16  
17  
18  
19  
20  
21  
22  
23  
24  
25  
26  
27  
28  
29  
30  
31  
32  
33  
34  
35  
36  
37  
38  
39  
40  
41  
42  
43  
44  
45  
46  
47  
48  
49  
50  
51  
52  
53  
54  
55  
56  
57  
58  
59  
60

\*\*The rationale should briefly discuss the justification for choosing that theory, approach, method, or technique rather than other options available, the assumptions and limitations implicit in those choices, and how those choices influence study conclusions and transferability. As appropriate, the rationale for several items might be discussed together.

**Reference:**

O'Brien BC, Harris IB, Beckman TJ, Reed DA, Cook DA. **Standards for reporting qualitative research: a synthesis of recommendations.** *Academic Medicine*, Vol. 89, No. 9 / Sept 2014  
DOI: 10.1097/ACM.0000000000000388

For peer review only
